# Supplementary material for: Youth Depression Symptoms During COVID-19
Source: Atypon-hosted journal article supplement (doi:10.1027/2151-2604/a000521), 2023-05-01
Supplement: 2151-2604_a000521_esm1.pdf [file 2151-2604_a000521_esm1.pdf]

**Electronic Supplementary Material 1 for**

Deppe, M., & Zapko-Willmes, A. (2023). Youth Depression Symptoms During COVID-19: A Longitudinal Twin Study on Resilience Factors. *Zeitschrift für Psychologie*, 231(2). <https://doi.org/10.1027/2151-2604/a000521>

## Youth Depression Symptoms During COVID-19: A Longitudinal Twin Study on Resilience Factors

### Supplement

#### Table of Contents:

|                                                                                                          |           |
|----------------------------------------------------------------------------------------------------------|-----------|
| <b>Supplement A:</b> Data Preprocessing, Hypotheses Background, and Descriptives                         | <b>2</b>  |
| <b>Supplement B:</b> Internal Consistency Estimates and Exploratory Factor Analyses                      | <b>8</b>  |
| <b>Supplement C:</b> Measurement Invariance Tests, Convergent Validity Test, and Factor Score Extraction | <b>14</b> |
| <b>Supplement D:</b> Augmented Backward Elimination and Control Analyses                                 | <b>22</b> |
| <b>Supplement E:</b> Latent Growth Curve Model and Twin Analyses                                         | <b>31</b> |

#### Document Description

This is the supplementary material for the paper “Youth Depression Symptoms During COVID-19: A Longitudinal Twin Study on Resilience Factors”. The study was pre-registered on 15 June 2022 (<https://osf.io/wurx2>).

The final study had three **deviations from the pre-registration**: (1) Survey weights, accounting for selective response patterns based on the first pre-pandemic survey (Krell et al., 2022), were not mentioned in the preregistration. (2) As the pandemic depression measure, three items of the PHQ-9 were proposed in the preregistration. Instead, the validated PHQ-2 (consisting of two of these items) was used. (3) we chose participations from narrower timeframes within the pandemic surveys to capture specific pandemic phases, namely the first pandemic wave, assessed in retrospect (study participations 06–11/2020), the (partial) lockdown during the second wave and subsequent third wave (11/2020–04/2021), and the onset of the fourth wave (09–11/2021). As a cutoff date for pre-pandemic information, we considered data from the third pre-pandemic survey up to 10 March 2020 (the day of the official WHO classification of SARS-CoV-2 as a pandemic). Additional analyses that are denoted as control analyses were not pre-registered as well and were performed post-hoc.

Scripts which were created in the analysis process for statistical software *Stata* (StataCorp, 2015) and *R* (R Core Team, 2022; RStudio Team, 2020; with mainly used packages *psych*, *lavaan*, *semTools*, *abe*, *umx*), can be accessed via <https://osf.io/gu4yk/>. The structure of this supplement follows the script file structure and denomination.

## Supplement A: Data Preprocessing, Hypotheses Background, and Descriptives

Our data base is the TwinLife Scientific Use File v6.0.0 (ZA6701; <https://doi.org/10.4232/1.13932>) with information on the third COVID-19 supplementary survey as well as regional and survey date information appended from internal pre-release data (set for publication in the next data releases). Information on seven-day COVID-19 incidence rates for Germany based on federal state and survey date was appended from the Robert Koch Institute (RKI).

### Data Preprocessing Procedures

(as in syntax file “SuppA\_TL-CovResilience\_01-DataPreprocessing.do”)

- Import of internal data (T-Cov3 data, survey date and federal state for all pandemic surveys).
- Variable selection, format of IUF data according to SUF structure, set all missing indicators to NA.
- Pooling of separated variables for analysis (gls\* over cohorts, pas\* over step-parents, hoe\* and emi\* variables according to SUF typology, summary of federal state information).
- Constructing family SES composite scores from ISCED, ISEI, EGP, and OECD-equivalence income: applying wave-specific Tukey’s Fences with k-value = 3 to income variable, square-root transformation of income and residualization for parents’ age for all four components.
- Sampling based on participation in either T-Cov1, T-Cov2, or T-Cov3 ( $N = 3,025$ ).
- Appending RKI seven-day incidence rate based on state and date.
- Summary of COVID-19 infection and/or quarantine measure in the household as a dichotomous index over T-Cov1,2,3 (to generate a control variable that is valid across time).
- Appending TwinLife panel weights based on participation rates in the first survey wave.
- Generating positive/negative life events index (simple additive indices computed from positive and negative life event evaluations – taken from T-Pre3, information from T-Pre2 summed up on top to generate a control variable that is valid across time).
- Wide format & analysis preparation (reverse coding of inverted item variables).

### Information on R packages

All further data analyses apart from data preprocessing were performed with *R*. For functions that are not covered by base *R*, we used the following packages.

- sjlabelled (version 1.2.0; Lüdtke, 2022): read\_stata() function for the importing of Stata \*.dta files.
- psych (version 2.2.5; Revelle, 2022): omega() and fa() functions for internal consistency checks and exploratory factor analyses.
- semTools (version 0.5.6; Jorgensen et al., 2022): measEq.syntax() function for measurement invariance tests over time.
- lavaan (version 0.6.11; Rosseel, 2012): cfa(), lavTestScore(), lavPredict(), growth(), and lavInspect() functions for convergent validity checks, measurement invariance tests across cohorts, confirmatory factor analyses, factor score extraction, and latent growth curve model analyses.
- abe (version 3.0.1; Blagus, 2017): abe() function for regression analyses using the augmented backwards elimination algorithm.
- yhat (version 2.0.3; Nimon et al., 2021): yhat() function to compute beta weights, commonality estimates, and structure coefficients.
- dotwhisker package (version 0.7.4; Solt & Hu, 2021): dwplot() function for dot whisker plot.
- umx package (version 4.10.50; Bates et al., 2019): umxACE(), umxReduce(), umxCP(), umxModify(), and umxCompare() functions for twin analyses.

### Information on figures:

Twin model figures and the pie chart were generated using LibreOffice (version 7.3.1.3 (x64)) and Inkscape (version 1.1.1 (3bf5ae0d25, 2021-09-20)).

Dot whisker plots were generated using R::dotwhisker() (version 0.7.4; Solt & Hu, 2021).

**Table E1.** Overview of Hypotheses' Background

| <b>No.</b> | <b>Hypothesis</b>                                                                                                  | <b>Background</b>                                                                                 |
|------------|--------------------------------------------------------------------------------------------------------------------|---------------------------------------------------------------------------------------------------|
| H1         | The level of and change in youth pandemic DS significantly varies between individuals.                             | Resilience theory, salutogenesis theory, transactional theory                                     |
| H2         | Individual characteristics affect the level of and change in pandemic DS.                                          | Transactional theory, core self-evaluation, self-efficacy theory,                                 |
| H2a        | Neuroticism positively affects the level of pandemic DS.                                                           | theory of self-determination,                                                                     |
| H2b        | Externalizing and internalizing behavior positively affect the level of pandemic DS.                               | salutogenesis theory,                                                                             |
| H2c        | Emotion-oriented coping positively affects the level of pandemic DS.                                               | transactional theory,                                                                             |
| H2d        | Task-oriented coping negatively affects the level of pandemic DS.                                                  | stress inoculation theory,                                                                        |
| H2e        | Self-efficacy and self-esteem negatively affect the level of pandemic DS.                                          | challenge model of resilience theory, empirical findings (e.g., Oshio et al., 2018)               |
| H2f        | Life satisfaction negatively affects the level of pandemic DS.                                                     |                                                                                                   |
| H2g        | Optimism negatively affects the level of pandemic DS.                                                              |                                                                                                   |
| H2h        | Negative life experiences have a U-shaped association with the level of pandemic DS.                               |                                                                                                   |
| H3         | Family characteristics affect the level of and change in pandemic DS.                                              | Socio-ecological framework, transactional theory,                                                 |
| H3a        | Parental emotional support negatively affects the level of pandemic DS.                                            | compensatory model of resilience theory                                                           |
| H3b        | Family socioeconomic status negatively affects the level of pandemic DS.                                           |                                                                                                   |
| H3c        | A chaotic home environment positively affects the level of pandemic DS.                                            |                                                                                                   |
| H4         | Unfolding genetic factors and accumulating environmental factors affect the change in youth pandemic DS.           | Three laws of behavior genetics (Turkheimer, 2000), empirical findings (e.g., Clark et al., 1994; |
| H5         | The effect of individual characteristics on the level of pandemic DS is primarily attributable to genetic factors. | Gillespie et al., 2015; Kandler & Ostendorf, 2016)                                                |

**Table E2.** Study Constructs and Measures

| <b>Construct</b>                                 | <b>Measures</b>                                                                                                                  | <b>References</b>                                           | <b>McDonald's <math>\omega</math></b> |
|--------------------------------------------------|----------------------------------------------------------------------------------------------------------------------------------|-------------------------------------------------------------|---------------------------------------|
| Depression symptoms                              |                                                                                                                                  |                                                             |                                       |
| Pre-pandemic                                     | Seven-item adaptation of the Beck Depression Inventory-Fast Screen                                                               | Beck et al., 2000                                           | .83                                   |
| Pandemic                                         | Two-item Patient Health Questionnaire (PHQ-2)                                                                                    | Löwe et al., 2005                                           | .63–.76                               |
| Big Five personality traits                      | G-SOEP adaptation of the Big Five Inventory                                                                                      | Gerlitz & Schupp, 2005                                      | .55–.81                               |
| Self-Efficacy                                    | Self-Efficacy Scale (Short Form)                                                                                                 | Beierlein et al., 2012                                      | .70–.78                               |
| Self-Esteem                                      | Rosenberg Self-Esteem Scale (adaptation)                                                                                         | Reim et al., 2022                                           | .80–.83                               |
| Optimism                                         | Life Orientation Test                                                                                                            | Glaesmer et al., 2008                                       | .75                                   |
| Life satisfaction                                | Satisfaction with Life Scale (adaptation)                                                                                        | Gadermann et al., 2010                                      | .85–.86                               |
| Coping styles                                    |                                                                                                                                  |                                                             |                                       |
| Adolescents                                      | German Coping Questionnaire for Children and Adolescents                                                                         | Hampel et al., 1997                                         | .51–.70                               |
| Young adults                                     | Coping Inventory for Stressful Situations                                                                                        | Endler & Parker, 1999                                       | .57–.66                               |
| Internalizing and externalizing problem behavior | Strengths and Difficulties Questionnaire                                                                                         | Goodman et al., 1998                                        | .59–.72                               |
| Family socio-economic status                     | Composite of parents' educational attainment, household income, and occupational status                                          | Gottschling et al., 2019                                    | .70–.71                               |
| Educational attainment                           | International Standard Classification of Education (ISCED-97)                                                                    | Schneider, 2008                                             |                                       |
| Household income                                 | OECD-modified scale                                                                                                              | <a href="https://bit.ly/3POXSEB">https://bit.ly/3POXSEB</a> |                                       |
| Occupational status                              | International Socio-Economic Index and Erikson-Goldthorpe-Portocarero classes, based on the current job as classified by ISCO-08 | Jann, 2019                                                  |                                       |
| Parental emotional support                       | three twin-report items, adapted from the German family panel pairfam                                                            | Reim et al., 2022                                           | .86                                   |
| Home environment                                 | Adaptation of the Confusion, Hubbub and Order Scale                                                                              | Matheny et al., 1995                                        | .66                                   |

*Note.* ISCO-08 = International Standard Classification of Occupations. We merged items of nearly identical, age-appropriate scale versions for adolescents and young adults into single variables (life satisfaction, home environment). To compute family socio-economic status (SES) scores, Tukey's fences with  $k = 3$  were applied to the upper end of the household income data, before square root-transforming the income data. Data following the International Standard Classification of Education and Erikson-Goldthorpe-Portocarero classes were set to a [0:100] range in accordance with the International Socio-Economic Index. For all four family SES components, we considered the highest level in the family. All family SES indicators were residualized for the mean age of the parents.

**Table E3.** Descriptives: Socio-Demographics and COVID-19 Indicators

| <b>Variable (cont.)</b>   | <b>Cohort</b> | <b>Min</b>    | <b>M</b>      | <b>Max</b>    | <b>SD</b>    | <b>Variance</b> | <b>Skewness</b> | <b>Kurtosis</b> |
|---------------------------|---------------|---------------|---------------|---------------|--------------|-----------------|-----------------|-----------------|
| Educational level         | 2003–04       | 1             | 8.61          | 11            | 1.96         | 3.85            | -1.38           | 4.35            |
| (highest family           | 1997–98       | 2             | 8.44          | 11            | 2.01         | 4.04            | -1.05           | 3.25            |
| ISCED-97)                 | 1990–93       | 3             | 8.93          | 11            | 1.45         | 2.09            | -1.57           | 5.15            |
| Occupational              | 2003–04       | 0             | 61.90         | 89            | 18.83        | 354.49          | -.84            | 3.13            |
| status/job prestige       | 1997–98       | 0             | 60.96         | 89            | 18.21        | 331.64          | -.63            | 2.91            |
| (ISEI from ISCO-08)       | 1990–93       | 15            | 65.41         | 89            | 14.14        | 199.94          | -.66            | 2.98            |
| Occupational              | 2003–04       | 0             | 70.51         | 100           | 27.11        | 734.80          | -1.09           | 2.91            |
| status/job prestige       | 1997–98       | 0             | 57.97         | 100           | 28.06        | 787.61          | -.42            | 1.93            |
| (EGP from ISCO-08)        | 1990–93       | 0             | 54.41         | 100           | 28.35        | 803.49          | -.34            | 1.72            |
| Household income          | 2003–04       | 211           | 1928.20       | 6630          | 822.09       | 675837.7        | 1.39            | 6.60            |
| (OECD-modified            | 1997–98       | 144           | 1950.86       | 6640          | 870.87       | 758417.6        | 1.36            | 6.06            |
| scale)                    | 1990–93       | 394           | 2353.45       | 5160          | 825.92       | 682146.4        | 0.72            | 3.77            |
| <b>Variable (dichot.)</b> | <b>Cohort</b> | <b>T-Cov1</b> | <b>T-Cov2</b> | <b>T-Cov3</b> | <b>Total</b> |                 |                 |                 |
| COVID-19 infection        | 2003–04       | 0.97          | 7.79          | 11.55         | 10.30        |                 |                 |                 |
| in the household          | 1997–98       | 2.59          | 7.81          | 11.34         | 9.73         |                 |                 |                 |
|                           | 1990–93       | 0.81          | 7.05          | 9.52          | 8.21         |                 |                 |                 |
| Quarantine measure        | 2003–04       | 7.46          | 24.67         | 30.86         | 31.91        |                 |                 |                 |
| in the household          | 1997–98       | 6.84          | 17.68         | 15.12         | 20.08        |                 |                 |                 |
|                           | 1990–93       | 6.49          | 13.67         | 15.65         | 16.95        |                 |                 |                 |

*Note.* cont. = continuous; dichot. = dichotomous. All values are based on mean scores, reported for sample description purposes only to ease interpretation within the range of the original scales. Values for dichotomous variables show proportion in percent. All items refer to the highest value within families. EGP computed on a reverse-coded scale on a range of [0:100] in preparation of latent socio-economic status composite.

**Table E4.** Descriptives: Mean Scores

| <b>Variable</b>        | <b>Cohort</b> | <b>Min</b> | <b>Mean</b> | <b>Max</b> | <b>SD</b> | <b>Variance</b> | <b>Skewness</b> | <b>Kurtosis</b> |
|------------------------|---------------|------------|-------------|------------|-----------|-----------------|-----------------|-----------------|
| Pandemic DS,<br>T-Cov1 | 2003–04       | 1          | 1.77        | 4          | 0.61      | 0.38            | 0.94            | 4.33            |
|                        | 1997–98       | 1          | 1.84        | 4          | 0.61      | 0.37            | 0.72            | 3.90            |
|                        | 1990–93       | 1          | 1.69        | 4          | 0.67      | 0.44            | 1.27            | 4.96            |
| Pandemic DS,<br>T-Cov2 | 2003–04       | 1          | 1.83        | 4          | 0.65      | 0.42            | 0.80            | 3.72            |
|                        | 1997–98       | 1          | 1.89        | 4          | 0.64      | 0.41            | 0.86            | 4.13            |
|                        | 1990–93       | 1          | 1.72        | 4          | 0.61      | 0.37            | 0.96            | 4.27            |
| Pandemic DS,<br>T-Cov3 | 2003–04       | 1          | 1.83        | 4          | 0.69      | 0.48            | 0.98            | 4.03            |
|                        | 1997–98       | 1          | 1.80        | 4          | 0.64      | 0.41            | 1.11            | 4.83            |
|                        | 1990–93       | 1          | 1.72        | 4          | 0.60      | 0.36            | 0.80            | 3.79            |
| Pre-pandemic DS        | 2003–04       | 1          | 1.58        | 4          | 0.42      | 0.18            | 1.55            | 7.41            |
|                        | 1997–98       | 1          | 1.64        | 3.71       | 0.47      | 0.22            | 1.09            | 4.25            |
|                        | 1990–93       | 1          | 1.62        | 3.43       | 0.46      | 0.21            | 1.05            | 4.25            |
| Openness               | 2003–04       | 1.67       | 4.92        | 7          | 1.00      | 1.00            | -0.34           | 2.71            |
|                        | 1997–98       | 1.33       | 4.88        | 7          | 1.07      | 1.15            | -0.21           | 2.55            |
|                        | 1990–93       | 2          | 4.73        | 7          | 1.11      | 1.23            | -0.13           | 2.42            |
| Conscientiousness      | 2003–04       | 1.83       | 4.93        | 7          | 0.92      | 0.84            | -0.12           | 2.63            |
|                        | 1997–98       | 2          | 5.14        | 7          | 0.96      | 0.91            | -0.34           | 2.79            |
|                        | 1990–93       | 2          | 5.51        | 7          | 0.87      | 0.75            | -0.51           | 3.21            |
| Extraversion           | 2003–04       | 1.33       | 4.88        | 7          | 1.00      | 1.00            | -0.29           | 2.81            |
|                        | 1997–98       | 1.33       | 4.72        | 7          | 1.28      | 1.63            | -0.23           | 2.44            |
|                        | 1990–93       | 1          | 4.79        | 7          | 1.30      | 1.68            | -0.35           | 2.49            |
| Agreeableness          | 2003–04       | 2.67       | 5.46        | 7          | 0.77      | 0.59            | -0.43           | 3.01            |
|                        | 1997–98       | 1.67       | 5.53        | 7          | 0.84      | 0.70            | -0.80           | 4.05            |
|                        | 1990–93       | 2.67       | 5.63        | 7          | 0.81      | 0.65            | -0.69           | 3.24            |

| Variable                                | Cohort  | Min  | Mean | Max  | SD   | Variance | Skewness | Kurtosis |
|-----------------------------------------|---------|------|------|------|------|----------|----------|----------|
| Neuroticism                             | 2003–04 | 1    | 3.80 | 6.83 | 0.99 | 0.99     | 0.17     | 2.86     |
|                                         | 1997–98 | 1.67 | 4.22 | 7    | 1.15 | 1.33     | -0.07    | 2.60     |
|                                         | 1990–93 | 1    | 4.11 | 7    | 1.20 | 1.43     | 0.04     | 2.54     |
| Life Satisfaction                       | 2003–04 | 1.6  | 4.12 | 5    | 0.62 | 0.38     | -0.88    | 3.57     |
|                                         | 1997–98 | 1.67 | 3.89 | 5    | 0.68 | 0.46     | -0.66    | 3.11     |
|                                         | 1990–93 | 1.13 | 3.88 | 5    | 0.70 | 0.49     | -0.72    | 3.23     |
| Self-Efficacy                           | 2003–04 | 1.67 | 3.84 | 5    | 0.47 | 0.22     | -0.54    | 4.33     |
|                                         | 1997–98 | 1.33 | 3.93 | 5    | 0.44 | 0.20     | -0.63    | 4.87     |
|                                         | 1990–93 | 1.2  | 4.01 | 5    | 0.50 | 0.25     | -1.17    | 7.34     |
| Self-Esteem                             | 2003–04 | 2    | 3.53 | 5    | 0.37 | 0.13     | -0.87    | 4.31     |
|                                         | 1997–98 | 1    | 3.45 | 4.2  | 0.36 | 0.13     | -1.10    | 5.57     |
|                                         | 1990–93 | 2    | 3.5  | 5    | 0.35 | 0.12     | -0.96    | 5.91     |
| Optimism                                | 2003–04 | 1    | 3.88 | 5    | 0.70 | 0.49     | -0.68    | 3.91     |
|                                         | 1997–98 | 1    | 3.70 | 5    | 0.75 | 0.57     | -0.53    | 3.48     |
|                                         | 1990–93 | 1    | 3.79 | 5    | 0.77 | 0.59     | -0.73    | 3.86     |
| Internalizing:<br>Emotional<br>Problems | 2003–04 | 1    | 1.53 | 3    | 0.36 | 0.13     | 0.74     | 3.34     |
|                                         | 1997–98 | 1    | 1.62 | 2.9  | 0.43 | 0.19     | 0.57     | 2.61     |
|                                         | 1990–93 | 1    | 1.58 | 3    | 0.43 | 0.18     | 0.69     | 2.88     |
| Internalizing:<br>Peer Problems         | 2003–04 | 1    | 1.42 | 3    | 0.32 | 0.10     | 0.92     | 4.19     |
|                                         | 1997–98 | 1    | 1.42 | 2.67 | 0.35 | 0.12     | 0.87     | 3.81     |
|                                         | 1990–93 | 1    | 1.37 | 2.83 | 0.36 | 0.13     | 1.11     | 3.99     |
| Externalizing:<br>Hyperactivity         | 2003–04 | 1    | 1.67 | 3    | 0.38 | 0.15     | 0.27     | 2.80     |
|                                         | 1997–98 | 1    | 1.60 | 3    | 0.41 | 0.17     | 0.34     | 2.63     |
|                                         | 1990–93 | 1    | 1.50 | 3    | 0.41 | 0.16     | 0.48     | 2.82     |
| Externalizing:<br>Misconduct            | 2003–04 | 1    | 1.25 | 3    | 0.25 | 0.63     | 1.54     | 6.94     |
|                                         | 1997–98 | 1    | 1.16 | 2.5  | 0.21 | 0.44     | 2.08     | 9.73     |
|                                         | 1990–93 | 1    | 1.13 | 2    | 0.17 | 0.03     | 1.62     | 5.90     |
| Home Environment                        | 2003–04 | 1    | 2.63 | 5    | 0.61 | 0.37     | 0.44     | 3.78     |
|                                         | 1997–98 | 1.25 | 2.60 | 4.25 | 0.54 | 0.29     | 0.60     | 2.97     |
|                                         | 1990–93 | 1    | 2.52 | 4.5  | 0.55 | 0.30     | 0.70     | 3.88     |
| Parental Emotional<br>Support           | 2003–04 | 1    | 4.38 | 5    | 0.62 | 0.39     | -1.32    | 5.46     |
|                                         | 1997–98 | 1    | 3.74 | 5    | 0.77 | 0.59     | -0.48    | 2.94     |
|                                         | 1990–93 | 1    | 3.83 | 5    | 0.76 | 0.58     | -0.59    | 3.21     |

*Note.* All values refer to mean scores, reported for sample description purposes only to ease interpretation within the range of the original scales. For all further analyses, regression scores from factor analysis are used.

**Table E5.** Rank-Order Stability of Depression Symptoms

| Variable | T-Pre2    | T-Pre3    | T-Cov1    | T-Cov2    | T-Cov3 |
|----------|-----------|-----------|-----------|-----------|--------|
| T-Pre2   | 1.0       |           |           |           |        |
| T-Pre3   | .54 (.51) | 1.0       |           |           |        |
| T-Cov1   | .32 (.24) | .40 (.30) | 1.0       |           |        |
| T-Cov2   | .32 (.24) | .38 (.29) | .42 (.43) | 1.0       |        |
| T-Cov3   | .37 (.27) | .46 (.34) | .42 (.41) | .45 (.44) | 1.0    |

*Note.* Values compare mean scores with autoregressive coefficients, indicating the predictive carryover effect (Haehner et al., 2021). Values in parentheses represent Pearson’s *r* correlation coefficients of mean scores.

**Figure E1.** Distribution of Pre-Pandemic and Pandemic Depression Symptoms

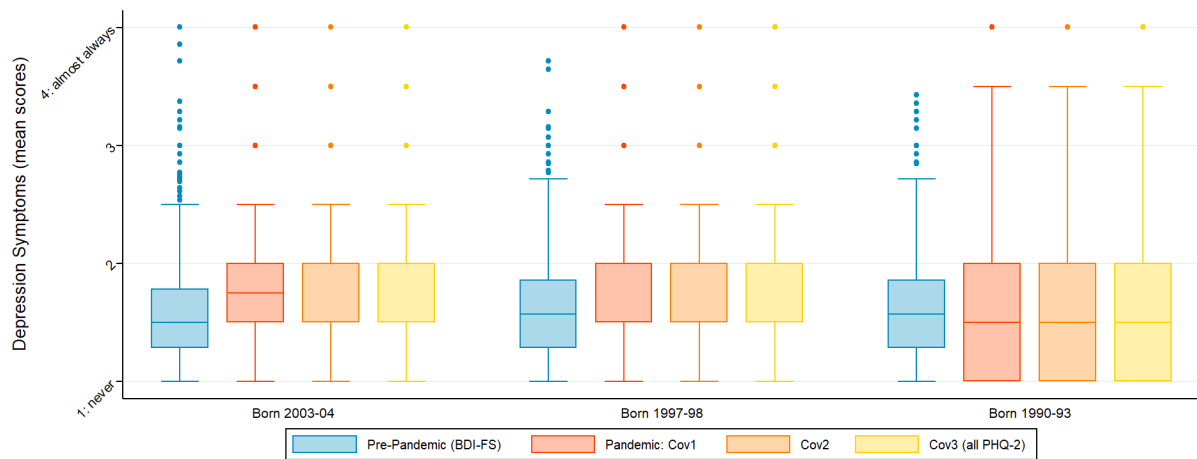

*Note.* Boxes represent the neighboring quartiles from the median, represented by the middle line. Whiskers represent upper and lower adjacent values (1.5x interquartile ranges from the inner quartile boxes). Dots represent outliers.

**Supplement B: Internal Consistency Estimates and Exploratory Factor Analyses****Table E6.** McDonald's  $\omega$  for Scales, Separately for Each Wave

| <b>Construct</b>               | <b>T-Pre1</b> | <b>T-Pre2</b> | <b>T-Pre3</b> | <b>T-Cov1</b> | <b>T-Cov2</b> | <b>T-Cov3</b> |
|--------------------------------|---------------|---------------|---------------|---------------|---------------|---------------|
| Depression Symptoms            |               |               |               |               |               |               |
| <i>BDI-Fast Screen</i>         |               | .83           | .83           |               |               |               |
| <i>PHQ-2</i>                   |               |               |               | .71           | .63           | .76           |
| Big Five                       |               |               |               |               |               |               |
| <i>Openness</i>                | .59           |               | .57           |               |               |               |
| <i>Conscientiousness</i>       | .64           |               | .70           |               |               |               |
| <i>Extraversion</i>            | .71           |               | .81           |               |               |               |
| <i>Agreeableness</i>           | .55           |               | .58           |               |               |               |
| <i>Neuroticism</i>             | .59           |               | .70           |               |               |               |
| Life Satisfaction              | .86           | .85           | .86           |               |               |               |
| Self-Efficacy                  | .70           | .76           | .78           |               |               |               |
| Self-Esteem                    |               | .80           | .83           |               |               |               |
| Optimism                       |               | .75           |               |               |               |               |
| C2: Coping Styles (SVF-KJ)     |               |               |               |               |               |               |
| <i>Self-Control</i>            |               | .70           |               |               |               |               |
| <i>Thoughts/Resignation</i>    |               | .56           |               |               |               |               |
| <i>Distraction</i>             |               | .51           |               |               |               |               |
| C3+4: Coping Styles (CISS)     |               |               |               |               |               |               |
| <i>Task Orientation</i>        |               | .57           |               |               |               |               |
| <i>Emotional</i>               |               | .59           |               |               |               |               |
| <i>Distraction</i>             |               | .66           |               |               |               |               |
| Internalizing Problem Behavior |               |               |               |               |               |               |
| <i>Emotional Problems</i>      | .69           |               | .76           |               |               |               |
| <i>Peer Problems</i>           | .47           |               | .48           |               |               |               |
| Externalizing Problem Behavior |               |               |               |               |               |               |
| <i>Hyperactivity</i>           | .70           |               | .55           |               |               |               |
| <i>Misconduct</i>              | .45           |               | .40           |               |               |               |
| Family Socio-Economic Status   | .70           | .70           | .70           |               |               |               |
| Home Environment               | .66           |               |               |               |               |               |
| Parental Emotional Support     | .86           |               |               |               |               |               |

*Note.* C2 = cohort 2, born 2003–04; C3+4 = cohorts 3 and 4, born 1997–98 and 1990–93, respectively; T-Pre1/2/3 = pre-pandemic survey 1/2/3; T-Cov1/2/3 = pandemic survey 1/2/3.





**Table E9.** Result of the Exploratory Factor Analyses of Home Environment Items

| Item name<br>(item description)                     | Factor Loading          |                                   |                                                | Scree-Plot |
|-----------------------------------------------------|-------------------------|-----------------------------------|------------------------------------------------|------------|
|                                                     | Factor 1<br>(all items) | Factor 1<br>(hoe0100r<br>omitted) | Factor 1<br>(hoe0100r<br>+ hoe0500<br>omitted) |            |
| hoe0100r_1 ([used to have] regular bedtime routine) | .223                    |                                   |                                                |            |
| hoe0200_1 (cannot think clearly at home)            | .639                    | .639                              | <b>.629</b>                                    |            |
| hoe0300_1 (at home everything is chaotic)           | .783                    | .793                              | <b>.785</b>                                    |            |
| hoe0400r_1 (at home everything is under control)    | .634                    | .635                              | <b>.652</b>                                    |            |
| hoe0500_1 (at home TV almost always on)             | .283                    | .272                              |                                                |            |
| hoe0600r_1 (the atmosphere at home is quiet)        | .677                    | .671                              | <b>.672</b>                                    |            |
| Explained variance                                  | .335                    | .393                              | <b>.472</b>                                    |            |

*Note.* Number of factors derived from Kaiser-Guttman criterion (Eigenvalues  $\geq 1$ ). Based on the principal axis method using a varimax rotation. Hierarchical comparison of three different factor structures. Items with insufficient factor loading in greyscale. Final model taken forward into analysis bold-faced.

**Table E10.** Result of the Exploratory Factor Analyses of Self-Esteem Items

| Item name<br>(item description)         | Factor Loading |        |
|-----------------------------------------|----------------|--------|
|                                         | T-Pre2         | T-Pre3 |
| ses0100r (feeling of worthlessness)     | .636           | .661   |
| ses0101 (liking oneself the way one is) | .881           | .892   |
| ses0102 (being satisfied with oneself)  | .881           | .925   |
| Explained variance                      | .652           | .696   |

Scree-Plot

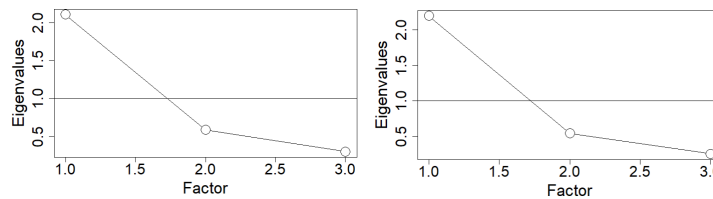

*Note.* T-Pre2/3 = pre-pandemic survey 2/3. Number of factors derived from Kaiser-Guttman criterion (Eigenvalues  $\geq 1$ ). Based on the principal axis method using a varimax rotation.

**Table E11.** Result of the Exploratory Factor Analyses of Life Satisfaction Items

| Item name<br>(item description)                   | Factor Loading |        |        |
|---------------------------------------------------|----------------|--------|--------|
|                                                   | T-Pre1         | T-Pre2 | T-Pre3 |
| gls1<br>(life almost ideal)                       | .838           | .834   | .820   |
| gls2 (excellent<br>life conditions)               | .767           | .741   | .772   |
| gls3<br>(satisfied with life)                     | .883           | .881   | .910   |
| gls4 (most important<br>wishes in life fulfilled) | .700           | .688   | .715   |
| gls5 (would change<br>almost nothing in life)     | .765           | .742   | .753   |
| Explained<br>variance                             | .629           | .609   | .635   |

  

| Item name (item description)                            | T-Pre1      |             | T-Pre3      |             |
|---------------------------------------------------------|-------------|-------------|-------------|-------------|
|                                                         | Factor 1    | Factor 2    | Factor 1    | Factor 2    |
| int0100_1 (I have frequent headaches/<br>stomach aches) | <b>.466</b> |             | <b>.535</b> | -.108       |
| int0101_1 (I'm often worried)                           | <b>.783</b> | -.121       | <b>.867</b> |             |
| int0102_1 (I'm often unhappy or depressed)              | <b>.667</b> | .141        | <b>.762</b> |             |
| int0103_1 (I'm nervous in new situations)               | <b>.568</b> | .112        | <b>.643</b> | .110        |
| int0104_1 (I have a lot of fears)                       | <b>.690</b> |             | <b>.767</b> |             |
| int0105_1 (I'm usually on my own)                       | .108        | <b>.432</b> | .137        | <b>.363</b> |
| int0106r_1 (I have one or more good friends)            |             | <b>.782</b> |             | <b>.703</b> |
| int0107r_1 (Other people generally like me)             |             | <b>.546</b> |             | <b>.714</b> |
| Explained variance                                      | .262        | .143        | .330        | .147        |

Note. T-Pre1/2/3 = pre-pandemic survey 1/2/3. Number of factors derived from Kaiser-Guttman criterion (Eigenvalues ≥ 1). Based on the principal axis method using a varimax rotation.

**Table E12.** Result of the Exploratory Factor Analyses of Internalizing Problem Behavior Items

| Item name (item description)                            | Factor Loading |             |             |             |
|---------------------------------------------------------|----------------|-------------|-------------|-------------|
|                                                         | T-Pre1         |             | T-Pre3      |             |
|                                                         | Factor 1       | Factor 2    | Factor 1    | Factor 2    |
| int0100_1 (I have frequent headaches/<br>stomach aches) | <b>.466</b>    |             | <b>.535</b> | -.108       |
| int0101_1 (I'm often worried)                           | <b>.783</b>    | -.121       | <b>.867</b> |             |
| int0102_1 (I'm often unhappy or depressed)              | <b>.667</b>    | .141        | <b>.762</b> |             |
| int0103_1 (I'm nervous in new situations)               | <b>.568</b>    | .112        | <b>.643</b> | .110        |
| int0104_1 (I have a lot of fears)                       | <b>.690</b>    |             | <b>.767</b> |             |
| int0105_1 (I'm usually on my own)                       | .108           | <b>.432</b> | .137        | <b>.363</b> |
| int0106r_1 (I have one or more good friends)            |                | <b>.782</b> |             | <b>.703</b> |
| int0107r_1 (Other people generally like me)             |                | <b>.546</b> |             | <b>.714</b> |
| Explained variance                                      | .262           | .143        | .330        | .147        |

  

| Item name (item description)                            | T-Pre1      |             | T-Pre3      |             |
|---------------------------------------------------------|-------------|-------------|-------------|-------------|
|                                                         | Factor 1    | Factor 2    | Factor 1    | Factor 2    |
| int0100_1 (I have frequent headaches/<br>stomach aches) | <b>.466</b> |             | <b>.535</b> | -.108       |
| int0101_1 (I'm often worried)                           | <b>.783</b> | -.121       | <b>.867</b> |             |
| int0102_1 (I'm often unhappy or depressed)              | <b>.667</b> | .141        | <b>.762</b> |             |
| int0103_1 (I'm nervous in new situations)               | <b>.568</b> | .112        | <b>.643</b> | .110        |
| int0104_1 (I have a lot of fears)                       | <b>.690</b> |             | <b>.767</b> |             |
| int0105_1 (I'm usually on my own)                       | .108        | <b>.432</b> | .137        | <b>.363</b> |
| int0106r_1 (I have one or more good friends)            |             | <b>.782</b> |             | <b>.703</b> |
| int0107r_1 (Other people generally like me)             |             | <b>.546</b> |             | <b>.714</b> |
| Explained variance                                      | .262        | .143        | .330        | .147        |

Note. T-Pre1/3 = pre-pandemic survey 1/3. Number of factors derived from Kaiser-Guttman criterion (Eigenvalues ≥ 1). Based on the principal axis method using an oblimin rotation. Factor allocation bold-faced.

**Table E13.** Result of the Exploratory Factor Analyses of Externalizing Problem Behavior Items

| Item name<br>(item description)                                | Factor Loading        |          |          |                           |          |                                     |             |                                     |             |
|----------------------------------------------------------------|-----------------------|----------|----------|---------------------------|----------|-------------------------------------|-------------|-------------------------------------|-------------|
|                                                                | T-Pre1<br>(all items) |          |          | T-Pre1<br>(excl. ext0106) |          | T-Pre1<br>(excl. ext0106 + ext0100) |             | T-Pre2<br>(excl. ext0106 + ext0100) |             |
|                                                                | Factor 1              | Factor 2 | Factor 3 | Factor 1                  | Factor 2 | Factor 1                            | Factor 2    | Factor 1                            | Factor 2    |
| ext0100<br>(I'm often restless)                                | .584                  |          |          | .243                      | .355     |                                     |             | <i>(omitted)</i>                    |             |
| ext0102 (I'm easily distracted<br>and unfocused)               | .716                  |          |          | .412                      | .312     | <b>.384</b>                         | .278        | <b>.565</b>                         | .136        |
| ext0103r<br>(I think before acting)                            |                       |          | .846     | .754                      | .        | <b>.718</b>                         |             | <b>.374</b>                         | .178        |
| ext0104r (I finish what I start<br>and am able to concentrate) |                       |          | .840     | .909                      | .        | <b>.980</b>                         |             | <b>.804</b>                         |             |
| ext0105<br>(I get mad easily)                                  | .246                  | .337     |          | .117                      | .459     | .120                                | <b>.445</b> |                                     | <b>.567</b> |
| ext0106r (I normally do what<br>people tell me to do)          |                       | .194     | .253     | <i>(omitted)</i>          |          | <i>(omitted)</i>                    |             |                                     |             |
| ext0107<br>(I attack others physically)                        |                       | .749     |          | .                         | .704     |                                     | <b>.720</b> | -.124                               | <b>.682</b> |
| ext0108<br>(People claim that I lie)                           |                       | .557     |          | .                         | .637     |                                     | <b>.636</b> | .105                                | <b>.461</b> |
| ext0109 (I take things that<br>don't belong to me)             |                       | .546     |          | .                         | .530     |                                     | <b>.542</b> | .171                                | <b>.563</b> |
| Explained variance                                             | .105                  | .149     | .166     | .206                      | .203     | .235                                | .214        | .166                                | .195        |

Scree-Plot

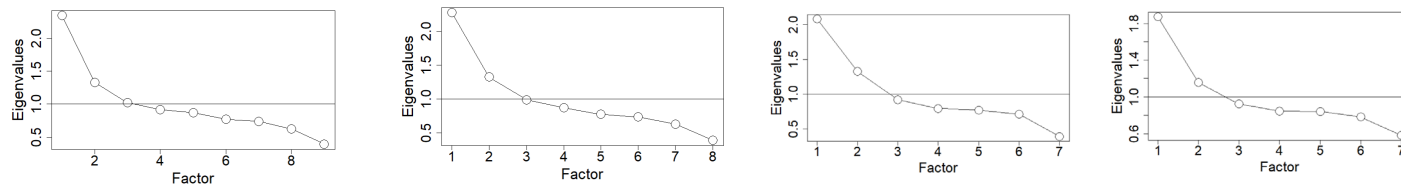

Note. T-Pre1/3 = pre-pandemic survey 1/3. Number of factors derived from Kaiser-Guttman criterion (Eigenvalues  $\geq 1$ ). Based on the principal axis method using an oblimin rotation. Two items were excluded during analysis: In the first observation time point, ext0106 (“I normally do what people tell me to do”) and ext0100 (“I’m often restless”) showed insufficient and theoretically unsound factor loadings and were therefore excluded (loadings displayed in greyscale). Factor allocation and final item configuration bold-faced.

**Table E14.** Result of the Exploratory Factor Analysis of Coping Styles Items as Measured for Adolescents

| Item name (item description)               | Factor Loading |             |             | Scree-Plot |
|--------------------------------------------|----------------|-------------|-------------|------------|
|                                            | Factor 1       | Factor 2    | Factor 3    |            |
| svk0100_3 (S-C: I make a plan)             | <b>.629</b>    |             |             |            |
| svk0103_3 (S-C: find out the problem)      | <b>.763</b>    |             |             |            |
| svk0106_3 (S-C: consider what I can do)    | <b>.729</b>    |             |             |            |
| svk0101_3 (T/R: think about the situation) | .473           | .462        |             |            |
| svk0104_3 (T/R: everything pointless)      |                | <b>.676</b> |             |            |
| svk0107_3 (T/R: rather avoid it)           | -.107          | <b>.627</b> |             |            |
| svk0102_3 (Dis: read something)            | .280           |             | <b>.348</b> |            |
| svk0105_3 (Dis: play something)            |                |             | <b>.657</b> |            |
| svk0108_3 (Dis: get comfy)                 |                |             | <b>.623</b> |            |
| Explained variance                         | .203           | .119        | .106        |            |

*Note.* Number of factors derived from Kaiser-Guttman criterion (Eigenvalues  $\geq 1$ ). Based on the principal axis method using an oblimin rotation. Variables that were omitted due to ambiguous factor loading displayed in greyscale. Factor allocation bold-faced. Abbreviations in parentheses indicate: S-C = Self-Control; T/R = Thoughts/Resignation; Dis = Distraction.

**Table E15.** Result of the Exploratory Factor Analysis of the Coping Styles Items as Measured for Young Adults

| Item name (item description)                       | Factor Loading |             |             | Scree-Plot |
|----------------------------------------------------|----------------|-------------|-------------|------------|
|                                                    | Factor 1       | Factor 2    | Factor 3    |            |
| cis0100_3 (T-O: learn from mistakes)               | <b>.569</b>    |             |             |            |
| cis0103_3 (T-O: take corrective action)            | <b>.726</b>    |             |             |            |
| cis0106_3 (T-O: control over situation)            | <b>.506</b>    |             |             |            |
| cis0101_3 (Emo: worry about what to do)            | .276           | <b>.443</b> |             |            |
| cis0104_3 (Emo: blame myself)                      |                | <b>.674</b> |             |            |
| cis0107_3 (Emo: anxious of not being able to cope) |                | <b>.715</b> |             |            |
| cis0102_3 (Dis: visit a friend)                    | .154           |             | <b>.336</b> |            |
| cis0105_3 (Dis: buy myself something)              |                |             | <b>.825</b> |            |
| cis0108_3 (Dis: go out for a snack or meal)        |                |             | <b>.790</b> |            |
| Explained variance                                 | .135           | .130        | .159        |            |

*Note.* Number of factors derived from Kaiser-Guttman criterion (Eigenvalues  $\geq 1$ ). Based on the principal axis method using an oblimin rotation. Factor allocation bold-faced. Abbreviations in parentheses indicate: T-O = Task-Orientation; Emo = Emotional; Dis = Distraction.

**Supplement C: Measurement Invariance Tests, Convergent Validity Test,  
and Factor Score Extraction**

**Table E16.** Results of the Modeling Comparison of Depression Symptoms Instruments

| Factor Model                      | RMSEA                | CFI  | SRMR | AIC       | df  | $\chi^2$ | p      |
|-----------------------------------|----------------------|------|------|-----------|-----|----------|--------|
| Model with one latent trait       | .038<br>[.036, .041] | .952 | .044 | 77877.746 | 156 | 834.92   | < .001 |
| Model with separate latent traits | .035<br>[.032, .037] | .961 | .032 | 77757.349 | 154 | 710.53   | < .001 |

*Note.* Missing data handled with full information maximum likelihood estimation. We allowed residual covariances of the same item between time points. The model comparison shows a comparably better fit of the two-factor model, leading to the conclusion that BDI-FS and PHQ-2 measure related ( $r = .628$ ) but different depression symptom constructs across time and/or depending on a pandemic situation. This is despite some face valid comparability of PHQ-2 and BDI-FS items (“little interest or pleasure in your activities” and “I find it difficult to enjoy anything”, as well as “dejection, melancholy or hopelessness” and “I am pessimistic about my future”). In other words, although previous research used versions of these instruments to test convergent validity (e.g., Kliem et al., 2014), we cannot rule out that these depression symptom measures meaningfully differ. Therefore, the depression symptom measurement based on the BDI-FS was used as a precedent independent variable, and the depression symptoms measurement based on the PHQ-2 was as the dependent variable.

**Table E17.** Results of the Measurement Invariance Tests Over Time

| Latent construct and MI level               | RMSEA       | CFI         | SRMR | AIC        | df  | $\chi^2$ | p      |
|---------------------------------------------|-------------|-------------|------|------------|-----|----------|--------|
| <b>Pre-Pandemic Depression Symptoms</b>     |             |             |      |            |     |          |        |
| (T-Pre2/3)                                  |             |             |      |            |     |          |        |
| configural                                  | .050        | .958        | .031 | 57720.127  | 69  | 550.84   | < .001 |
| metric                                      | .048        | .957        | .032 | 57718.334  | 75  | 561.05   | < .001 |
| scalar                                      | .048        | .955        | .033 | 57738.463  | 81  | 593.18   | < .001 |
| <b>strict</b>                               | <b>.047</b> | <b>.953</b> | .035 | 57753.157  | 88  | 621.87   | < .001 |
| <b>Socio-Economic Status</b> (T-Pre1/2/3)   |             |             |      |            |     |          |        |
| configural                                  | .046        | .984        | .031 | 260258.157 | 39  | 291.39   | < .001 |
| metric                                      | .046        | .982        | .034 | 260284.475 | 45  | 329.71   | < .001 |
| scalar                                      | .049        | .976        | .035 | 260361.857 | 51  | 419.09   | < .001 |
| <b>strict</b>                               | <b>.052</b> | <b>.968</b> | .037 | 260473.232 | 59  | 546.46   | < .001 |
| <b>Life Satisfaction</b> (T-Pre1/2/3)       |             |             |      |            |     |          |        |
| configural                                  | .032        | .988        | .027 | 90771.681  | 72  | 293.36   | < .001 |
| metric                                      | .031        | .988        | .028 | 90769.587  | 80  | 307.27   | < .001 |
| scalar                                      | .031        | .986        | .029 | 90794.862  | 88  | 348.54   | < .001 |
| <b>strict</b>                               | <b>.031</b> | <b>.985</b> | .030 | 90806.331  | 98  | 380.01   | < .001 |
| <b>Self-Esteem</b> (T-Pre2/3)               |             |             |      |            |     |          |        |
| configural                                  | .032        | .998        | .018 | 32650.606  | 5   | 19.03    | .002   |
| metric                                      | .026        | .998        | .018 | 32647.397  | 7   | 19.82    | .006   |
| scalar                                      | .044        | .992        | .024 | 32680.556  | 9   | 56.98    | < .001 |
| partial scalar (intercept of ses0102 freed) | .037        | .995        | .021 | 32664.795  | 8   | 39.22    | < .001 |
| <b>strict</b> (intercept of ses0102 freed)  | <b>.039</b> | <b>.992</b> | .022 | 32677.666  | 11  | 58.09    | < .001 |
| <b>Self-Efficacy</b> (T-Pre1/2/3)           |             |             |      |            |     |          |        |
| configural                                  | .009        | .999        | .011 | 42794.350  | 15  | 19.08    | .210   |
| metric                                      | .009        | .999        | .012 | 42790.939  | 19  | 23.67    | .209   |
| <b>scalar</b>                               | <b>.024</b> | <b>.994</b> | .016 | 42820.717  | 23  | 61.45    | < .001 |
| strict                                      | .074        | .925        | .041 | 43253.193  | 29  | 505.92   | < .001 |
| <b>Internalizing Behavior</b> (T-Pre1/3)    |             |             |      |            |     |          |        |
| <u>baseline</u>                             | .147        |             |      |            |     |          |        |
| configural                                  | .032        | .965        | .028 | 69913.860  | 90  | 360.55   | < .001 |
| metric                                      | .031        | .965        | .028 | 69911.399  | 96  | 370.08   | < .001 |
| scalar                                      | .035        | .951        | .031 | 70010.221  | 102 | 480.91   | < .001 |
| <b>strict</b>                               | <b>.039</b> | <b>.936</b> | .037 | 70124.279  | 110 | 610.96   | < .001 |
| <b>Externalizing Behavior</b> (T-Pre1/3)    |             |             |      |            |     |          |        |
| <u>baseline</u>                             | .126        |             |      |            |     |          |        |
| configural                                  | .039        | .931        | .037 | 43864.064  | 64  | 364.56   | < .001 |
| metric                                      | .044        | .905        | .044 | 43970.652  | 69  | 481.15   | < .001 |
| scalar                                      | .043        | .904        | .044 | 43971.953  | 74  | 492.45   | < .001 |
| <b>strict</b>                               | <b>.054</b> | <b>.836</b> | .055 | 44260.973  | 81  | 795.47   | < .001 |
| <b>Big Five</b> (T-Pre1/3)                  |             |             |      |            |     |          |        |
| <u>baseline</u>                             | .123        |             |      |            |     |          |        |
| configural                                  | .050        | .868        | .057 | 269447.029 | 345 | 2957.87  | < .001 |
| metric                                      | .050        | .865        | .058 | 269501.796 | 355 | 3032.63  | < .001 |
| scalar                                      | .052        | .848        | .060 | 269827.501 | 365 | 3378.34  | < .001 |
| <b>strict</b>                               | <b>.054</b> | <b>.830</b> | .062 | 270172.891 | 380 | 3753.73  | < .001 |

Note. T-Pre1/2/3 = pre-pandemic survey 1/2/3; MI = measurement invariance. Missing data handled with full information maximum likelihood estimation. We allowed residual covariances of the same item between time points. Highest level of found measurement invariance and relevant measures for interpretation are bold-faced. Baseline RMSEA only reported when CFI was low (CFI not interpreted and in grayscale when baseline RMSEA < .158). Measurement invariance for the two-item pandemic depression measure was not tested.

**Table E18.** Results of Measurement Invariance Tests Across Cohorts

| Latent construct and MI level                                                                                                   | RMSEA       | CFI         | SRMR | AIC        | df  | $\chi^2$ | p      |
|---------------------------------------------------------------------------------------------------------------------------------|-------------|-------------|------|------------|-----|----------|--------|
| <b>Pre-Pandemic Depression Symptoms</b>                                                                                         |             |             |      |            |     |          |        |
| configural                                                                                                                      | .052        | .955        | .036 | 57251.089  | 207 | 728.90   | < .001 |
| metric                                                                                                                          | .052        | .951        | .047 | 57275.750  | 231 | 801.56   | < .001 |
| scalar                                                                                                                          | .056        | .937        | .051 | 57419.954  | 255 | 989.77   | < .001 |
| ...                                                                                                                             |             |             |      |            |     |          |        |
| <b>partial scalar</b> (intercepts of bdi0103_3 and bdi0105_3 freed)                                                             | <b>.052</b> | <b>.945</b> | .049 | 57326.307  | 251 | 892.12   | < .001 |
| invariance of factor variances (intercepts freed as above)                                                                      | .053        | .943        | .060 | 57339.638  | 255 | 913.45   | < .001 |
| <b>invariance of factor covariances</b> (intercepts freed as above)                                                             | <b>.053</b> | <b>.942</b> | .066 | 57350.004  | 257 | 927.82   | < .001 |
| <b>strict</b> (intercepts freed as above)                                                                                       | .056        | .929        | .058 | 57480.639  | 279 | 1102.45  | < .001 |
| <b>Socio-Economic Status</b>                                                                                                    |             |             |      |            |     |          |        |
| configural                                                                                                                      | .049        | .982        | .034 | 258129.556 | 117 | 405.29   | < .001 |
| metric                                                                                                                          | .051        | .978        | .051 | 258179.229 | 135 | 490.96   | < .001 |
| scalar                                                                                                                          | .074        | .948        | .067 | 258694.577 | 153 | 1002.31  | < .001 |
| ...                                                                                                                             |             |             |      |            |     |          |        |
| <b>partial scalar</b> (intercepts of inc0411s_resid_5 and _1, emp0508r_resid_1 and _5 freed)                                    | <b>.060</b> | <b>.968</b> | .056 | 258338.646 | 145 | 670.38   | < .001 |
| invariance of factor variances (intercepts freed as above)                                                                      | .064        | .962        | .105 | 258427.497 | 151 | 771.23   | < .001 |
| invariance of factor covariances (intercepts freed as above)                                                                    | .074        | .946        | .112 | 258678.243 | 157 | 1033.97  | < .001 |
| ...                                                                                                                             |             |             |      |            |     |          |        |
| <b>partial invariance of factor covariances</b> (intercepts freed as above and covariances of SES_01 with SES_03 and _05 freed) | <b>.067</b> | <b>.957</b> | .109 | 258507.587 | 153 | 855.32   | < .001 |
| <b>strict</b> (intercepts and covariances freed as above)                                                                       | .073        | .942        | .128 | 258732.336 | 177 | 1128.07  | < .001 |
| <b>Life Satisfaction</b>                                                                                                        |             |             |      |            |     |          |        |
| <u>baseline</u>                                                                                                                 | .249        |             |      |            |     |          |        |
| configural                                                                                                                      | .035        | .987        | .028 | 89097.210  | 216 | 479.61   | < .001 |
| metric                                                                                                                          | .045        | .976        | .054 | 89289.808  | 240 | 720.21   | < .001 |
| partial metric (loading of gls2_1 freed)                                                                                        | .042        | .978        | .049 | 89236.915  | 238 | 663.32   | < .001 |
| scalar (loading of gls2_1 freed)                                                                                                | .066        | .941        | .063 | 89941.713  | 262 | 1416.11  | < .001 |
| ...                                                                                                                             |             |             |      |            |     |          |        |
| <b>partial scalar</b> (loading of gls2_1 and intercepts of gls1_1, _3 and _5, gls2_3 and _5 freed)                              | <b>.045</b> | <b>.974</b> | .051 | 89312.266  | 252 | 766.67   | < .001 |
| invariance of factor variances (loading and intercepts freed as above)                                                          | .045        | .973        | .054 | 89312.518  | 258 | 778.92   | < .001 |
| <b>invariance of factor covariances</b> (loading and intercepts freed as above)                                                 | <b>.050</b> | <b>.966</b> | .079 | 89454.832  | 264 | 933.23   | < .001 |
| <b>strict</b> (loadings/intercepts freed as above)                                                                              | .064        | .938        | .078 | 89976.571  | 294 | 1514.97  | < .001 |
| <b>Parental Emotional Support</b>                                                                                               |             |             |      |            |     |          |        |
| configural                                                                                                                      | .020        | .999        | .011 | 38509.850  | 15  | 21.22    | .130   |
| metric                                                                                                                          | .023        | .998        | .018 | 38507.283  | 23  | 34.65    | .056   |
| scalar                                                                                                                          | .055        | .987        | .031 | 38581.278  | 31  | 124.64   | < .001 |
| <b>partial scalar</b> (intercept of pas0101f_1 freed)                                                                           | <b>.032</b> | <b>.996</b> | .023 | 38519.973  | 29  | 59.34    | .001   |
| invariance of factor variances (intercept of pas0101f_1 freed)                                                                  | .063        | .982        | .122 | 38614.582  | 33  | 161.95   | < .001 |
| <b>invariance of factor covariances</b> (intercept of pas0101f_1 and factor variances freed)                                    | <b>.038</b> | <b>.994</b> | .053 | 38532.072  | 31  | 75.44    | < .001 |
| <b>strict</b> (intercept of pas0101f_1 and factor variances freed)                                                              | .070        | .971        | .079 | 38688.296  | 43  | 255.66   | < .001 |



| Latent construct and MI level           | RMSEA       | CFI         | SRMR | AIC        | df   | $\chi^2$ | p      |
|-----------------------------------------|-------------|-------------|------|------------|------|----------|--------|
| <b>Home Environment</b>                 |             |             |      |            |      |          |        |
| configural                              | .061        | .989        | .017 | 32280.009  | 6    | 28.65    | < .001 |
| metric                                  | .044        | .989        | .022 | 32274.426  | 12   | 35.07    | < .001 |
| <b>scalar</b>                           | <b>.050</b> | <b>.979</b> | .030 | 32289.734  | 18   | 62.38    | < .001 |
| invariance of factor variances          | .051        | .976        | .044 | 32294.907  | 20   | 71.55    | < .001 |
| strict                                  | .082        | .912        | .060 | 32422.038  | 28   | 214.68   | < .001 |
| <b>Optimism</b>                         |             |             |      |            |      |          |        |
| configural                              | .086        | .989        | .021 | 17582.840  | 3    | 21.59    | < .001 |
| metric                                  | .063        | .990        | .022 | 17579.093  | 5    | 21.84    | .001   |
| scalar                                  | .050        | .989        | .028 | 17577.091  | 9    | 27.84    | .001   |
| invariance of factor variances          | .064        | .977        | .071 | 17594.799  | 11   | 49.55    | < .001 |
| <b>strict (factor variances freed)</b>  | <b>.052</b> | <b>.979</b> | .031 | 17586.669  | 15   | 49.42    | < .001 |
| <b>Self-Esteem</b>                      |             |             |      |            |      |          |        |
| configural                              | .051        | .994        | .026 | 32454.562  | 15   | 51.60    | < .001 |
| metric                                  | .050        | .991        | .034 | 32462.608  | 23   | 75.64    | < .001 |
| scalar                                  | .050        | .988        | .035 | 32474.214  | 31   | 103.25   | < .001 |
| invariance of factor variances          | .050        | .986        | .054 | 32480.282  | 35   | 117.32   | < .001 |
| <b>invariance of factor covariances</b> | <b>.057</b> | <b>.981</b> | .053 | 32508.533  | 37   | 149.57   | < .001 |
| <b>strict</b>                           | <b>.060</b> | <b>.972</b> | .065 | 32548.456  | 49   | 213.49   | < .001 |
| <b>Self-Efficacy</b>                    |             |             |      |            |      |          |        |
| configural                              | .017        | .998        | .017 | 42198.790  | 45   | 57.45    | .101   |
| metric                                  | .016        | .998        | .021 | 42189.919  | 57   | 72.58    | .080   |
| <b>scalar</b>                           | <b>.024</b> | <b>.994</b> | .024 | 42201.327  | 69   | 107.98   | .002   |
| invariance of factor variances          | .027        | .992        | .041 | 42210.362  | 75   | 129.02   | < .001 |
| <b>invariance of factor covariances</b> | <b>.028</b> | <b>.990</b> | .044 | 42214.245  | 81   | 144.90   | < .001 |
| strict                                  | .074        | .916        | .074 | 42681.763  | 99   | 648.42   | < .001 |
| <b>Internalizing Behavior</b>           |             |             |      |            |      |          |        |
| <u>baseline</u>                         | .150        |             |      |            |      |          |        |
| configural                              | .034        | .961        | .034 | 69271.577  | 270  | 588.36   | < .001 |
| metric                                  | .033        | .961        | .036 | 69246.637  | 294  | 611.42   | < .001 |
| scalar                                  | .043        | .926        | .043 | 69509.609  | 318  | 922.39   | < .001 |
| invariance of factor variances          | .044        | .923        | .051 | 69523.087  | 326  | 951.87   | < .001 |
| <b>invariance of factor covariances</b> | <b>.045</b> | .917        | .057 | 69561.415  | 338  | 1014.20  | < .001 |
| <b>strict</b>                           | <b>.047</b> | .901        | .063 | 69663.049  | 370  | 1179.83  | < .001 |
| <b>Externalizing Behavior</b>           |             |             |      |            |      |          |        |
| <u>baseline</u>                         | .124        |             |      |            |      |          |        |
| configural                              | .042        | .919        | .044 | 42053.727  | 192  | 535.95   | < .001 |
| metric                                  | .042        | .911        | .047 | 42066.775  | 212  | 589.00   | < .001 |
| <b>scalar</b>                           | <b>.044</b> | .892        | .050 | 42125.412  | 232  | 687.64   | < .001 |
| invariance of factor variances          | .048        | .867        | .058 | 42225.064  | 240  | 803.29   | < .001 |
| <b>invariance of factor covariances</b> | <b>.048</b> | .862        | .059 | 42233.316  | 252  | 835.54   | < .001 |
| strict                                  | .081        | .560        | .139 | 43480.909  | 280  | 2139.13  | < .001 |
| <b>Big Five</b>                         |             |             |      |            |      |          |        |
| <u>baseline</u>                         | .126        |             |      |            |      |          |        |
| configural                              | .050        | .874        | .062 | 267014.845 | 1035 | 3679.31  | < .001 |
| metric                                  | .051        | .864        | .065 | 267169.940 | 1075 | 3914.40  | < .001 |
| scalar                                  | .054        | .845        | .067 | 267534.797 | 1115 | 4359.26  | < .001 |
| invariance of factor variances          | .054        | .838        | .073 | 267650.514 | 1135 | 4514.98  | < .001 |
| <b>invariance of factor covariances</b> | <b>.055</b> | .823        | .079 | 267890.977 | 1225 | 4935.44  | < .001 |
| <b>strict</b>                           | <b>.058</b> | .792        | .082 | 268477.057 | 1285 | 5641.52  | < .001 |

Note. T-Pre1/2/3 = pre-pandemic survey 1/2/3; MI = measurement invariance. Missing data handled with full information maximum likelihood estimation. Highest level of found measurement invariance and relevant measures for interpretation are bold-faced. Baseline RMSEA only reported when CFI was low (CFI not interpreted and in grayscale when baseline RMSEA < .158). Measurement invariance for the two-item pandemic depression measure was not tested.

**Table E19.** Results of Confirmatory Factor Analyses for the Validated Instruments and Depression Symptoms Used for the Factor Score Extraction

| Latent Construct             | RMSEA [CI]           | SRMR | CFI (nullRMSEA) | AIC        | df  | $\chi^2$ ( <i>p</i> )          | Standardized Factor Loading |             |             |             |
|------------------------------|----------------------|------|-----------------|------------|-----|--------------------------------|-----------------------------|-------------|-------------|-------------|
|                              |                      |      |                 |            |     |                                | Item                        | T-Pre1      | T-Pre2      | T-Pre3      |
| <b>Optimism</b>              | .060<br>[.030, .096] | .020 | .995            | 17618.086  | 1   | 10.07 (.002)                   | lot0100                     |             | .733        |             |
|                              |                      |      |                 |            |     |                                | lot0101                     |             | .754        |             |
|                              |                      |      |                 |            |     |                                | lot0102                     |             | .627        |             |
| <b>Self-Efficacy</b>         | .018<br>[.008, .027] | .021 | .997            | 42804.577  | 17  | 33.30 (.010)                   | sef0100                     | .646        | .680        | .705        |
|                              |                      |      |                 |            |     |                                | sef0101                     | .692        | .737        | .776        |
|                              |                      |      |                 |            |     |                                | sef0102                     | .643        | .721        | .747        |
|                              |                      |      |                 |            |     |                                | <b>HOF loading</b>          | <b>.685</b> | <b>.762</b> | <b>.715</b> |
| <b>Socio-Economic Status</b> | .046<br>[.041, .051] | .031 | .983            | 260264.851 | 41  | 302.08<br>( <i>&lt;</i> .001)  | eca0108                     | .636        | .612        | .617        |
|                              |                      |      |                 |            |     |                                | emp0505                     | .913        | .928        | .847        |
|                              |                      |      |                 |            |     |                                | emp0508                     | .483        | .435        | .482        |
|                              |                      |      |                 |            |     |                                | inc0411                     | .330        | .420        | .458        |
|                              |                      |      |                 |            |     |                                | <b>HOF loading</b>          | <b>.896</b> | <b>.962</b> | <b>.910</b> |
| <b>Big Five</b>              | .049<br>[.048, .051] | .058 | .868<br>(.123)  | 269449.638 | 355 | 2980.48<br>( <i>&lt;</i> .001) | O: per0113                  | .516        |             | .476        |
|                              |                      |      |                 |            |     |                                | O: per0103                  | .712        |             | .759        |
|                              |                      |      |                 |            |     |                                | O: per0108                  | .431        |             | .397        |
|                              |                      |      |                 |            |     |                                | C: per0100                  | .731        |             | .753        |
|                              |                      |      |                 |            |     |                                | C: per0110                  | .703        |             | .678        |
|                              |                      |      |                 |            |     |                                | C: per0106r                 | .362        |             | .524        |
|                              |                      |      |                 |            |     |                                | E: per0101                  | .789        |             | .825        |
|                              |                      |      |                 |            |     |                                | E: per0107                  | .724        |             | .829        |
|                              |                      |      |                 |            |     |                                | E: per0111r                 | .476        |             | .631        |
|                              |                      |      |                 |            |     |                                | A: per0112                  | .911        |             | 1.013       |
|                              |                      |      |                 |            |     |                                | A: per0105                  | .343        |             | .251        |
|                              |                      |      |                 |            |     |                                | A: per0102r                 | .329        |             | .421        |
|                              |                      |      |                 |            |     |                                | N: per0114r                 | .448        |             | .573        |
|                              |                      |      |                 |            |     |                                | N: per0109                  | .719        |             | .778        |
|                              |                      |      |                 |            |     |                                | N: per0104                  | .528        |             | .612        |
|                              |                      |      |                 |            |     |                                | <b>HOF loading</b>          |             |             |             |
|                              |                      |      |                 |            |     |                                | <b>O</b>                    | <b>.748</b> |             | <b>.823</b> |
| <b>C</b>                     | <b>.741</b>          |      | <b>.764</b>     |            |     |                                |                             |             |             |             |
| <b>E</b>                     | <b>.861</b>          |      | <b>.780</b>     |            |     |                                |                             |             |             |             |
| <b>A</b>                     | <b>.717</b>          |      | <b>.687</b>     |            |     |                                |                             |             |             |             |
| <b>N</b>                     | <b>.894</b>          |      | <b>.742</b>     |            |     |                                |                             |             |             |             |

| Latent Construct                        | RMSEA [CI]           | SRMR | CFI (nullRMSEA)    | AIC       | df          | $\chi^2$ ( <i>p</i> )         | Standardized Factor Loading |               |               |               |
|-----------------------------------------|----------------------|------|--------------------|-----------|-------------|-------------------------------|-----------------------------|---------------|---------------|---------------|
|                                         |                      |      |                    |           |             |                               | Item                        | T-Pre1        | T-Pre2        | T-Pre3        |
| <b>Pre-Pandemic Depression Symptoms</b> | .050<br>[.046, .054] | .031 | .958               | 57720.127 | 69          | 550.84<br>( <i>&lt;</i> .001) | bdi0100                     |               | .598          | .580          |
|                                         |                      |      |                    |           |             |                               | bdi0101                     |               | .584          | .600          |
|                                         |                      |      |                    |           |             |                               | bdi0102                     |               | .775          | .779          |
|                                         |                      |      |                    |           |             |                               | bdi0103                     |               | .539          | .505          |
|                                         |                      |      |                    |           |             |                               | bdi0104                     |               | .775          | .793          |
|                                         |                      |      |                    |           |             |                               | bdi0105                     |               | .707          | .711          |
|                                         |                      |      |                    |           |             |                               | bdi0106                     |               | .447          | .482          |
|                                         |                      |      | <b>HOF loading</b> |           | <b>.741</b> | <b>.782</b>                   |                             |               |               |               |
| <b>Pandemic Depression Symptoms</b>     | .007<br>[.000, .027] | .015 | 1.000              | 20411.258 | 15          | 5.62 (.345)                   |                             | <b>T-Cov1</b> | <b>T-Cov2</b> | <b>T-Cov3</b> |
|                                         |                      |      |                    |           |             |                               | emi0110                     | .753          | .658          | .824          |
|                                         |                      |      |                    |           |             |                               | emi0111                     | .751          | .704          | .748          |
|                                         |                      |      |                    |           |             |                               | <b>HOF loading</b>          | <b>.744</b>   | <b>.799</b>   | <b>.707</b>   |

Note. nullRMSEA = baseline RMSEA; T-Pre1/2/3 = pre-pandemic survey 1/2/3. T-Cov1/2/3 = pandemic survey 1/2/3; HOF = higher-order factor; O = openness; C = conscientiousness; E = extraversion; A = agreeableness; N = neuroticism. Missing data handled with full information maximum likelihood estimation. We allowed residual covariances of the same item between time points. Standardized factor loadings with first item of latent group set as reference. Baseline RMSEA only reported when CFI was low (CFI not interpreted and in grayscale when baseline RMSEA < .158).

**Table E20.** Confirmatory Factor Analyses for Constructs with Previous Exploratory Factor Analysis Used for the Factor Score Extraction

| Latent Construct                      | RMSEA [CI]           | SRMR | CFI (nullRMSEA) | AIC       | df | $\chi^2$ (p)    | Standardized Factor Loading |             |             |             |
|---------------------------------------|----------------------|------|-----------------|-----------|----|-----------------|-----------------------------|-------------|-------------|-------------|
|                                       |                      |      |                 |           |    |                 | Item                        | T-Pre1      | T-Pre2      | T-Pre3      |
| <b>Parental Emotional Support</b>     | .017<br>[.000, .033] | .007 | 1.000           | 39442.045 | 15 | 9.08 (.106)     | pas0100m                    | .775        |             |             |
|                                       |                      |      |                 |           |    |                 | pas0101m                    | .730        |             |             |
|                                       |                      |      |                 |           |    |                 | pas0102m                    | .704        |             |             |
|                                       |                      |      |                 |           |    |                 | pas0100f                    | .860        |             |             |
|                                       |                      |      |                 |           |    |                 | pas0101f                    | .840        |             |             |
|                                       |                      |      |                 |           |    |                 | pas0102f                    | .822        |             |             |
| <b>Home Environment</b>               | .052<br>[.032, .075] | .014 | .992            | 32431.139 | 2  | 18.46 (< .001)  | hoe0200                     | .511        |             |             |
|                                       |                      |      |                 |           |    |                 | hoe0300                     | .729        |             |             |
|                                       |                      |      |                 |           |    |                 | hoe0400                     | .575        |             |             |
|                                       |                      |      |                 |           |    |                 | hoe0600                     | .633        |             |             |
| <b>Self-Esteem</b>                    | .032<br>[.017, .047] | .018 | .998            | 32650.606 | 5  | 19.03 (.002)    | ses0100r                    |             | .570        | .603        |
|                                       |                      |      |                 |           |    |                 | ses0101                     |             | .831        | .841        |
|                                       |                      |      |                 |           |    |                 | ses0102                     |             | .841        | .881        |
|                                       |                      |      |                 |           |    |                 | <b>HOF loading</b>          |             | <b>.754</b> | <b>.723</b> |
| <b>Life Satisfaction</b>              | .033<br>[.030, .037] | .036 | .987            | 90795.826 | 74 | 321.50 (< .001) | gls1                        | .798        | .781        | .796        |
|                                       |                      |      |                 |           |    |                 | gls2                        | .731        | .695        | .737        |
|                                       |                      |      |                 |           |    |                 | gls3                        | .826        | .820        | .850        |
|                                       |                      |      |                 |           |    |                 | gls4                        | .662        | .636        | .666        |
|                                       |                      |      |                 |           |    |                 | gls5                        | .713        | .670        | .691        |
|                                       |                      |      |                 |           |    |                 | <b>HOF loading</b>          | <b>.731</b> | <b>.755</b> | <b>.711</b> |
| <b>Internalizing Problem Behavior</b> | .039<br>[.036, .042] | .039 | .945 (.147)     | 70240.706 | 93 | 522.94 (< .001) | F1: int0100                 | .357        |             | .372        |
|                                       |                      |      |                 |           |    |                 | F1: int0101                 | .620        |             | .698        |
|                                       |                      |      |                 |           |    |                 | F1: int0102                 | .600        |             | .654        |
|                                       |                      |      |                 |           |    |                 | F1: int0103                 | .549        |             | .633        |
|                                       |                      |      |                 |           |    |                 | F1: int0104                 | .601        |             | .695        |
|                                       |                      |      |                 |           |    |                 | F1: int0105                 | .449        |             | .425        |
|                                       |                      |      |                 |           |    |                 | F2: int0106r                | .464        |             | .435        |
|                                       |                      |      |                 |           |    |                 | F2: int0107r                | .476        |             | .553        |
|                                       |                      |      |                 |           |    |                 | <b>HOF loading</b>          |             |             |             |

| Latent Construct                      | RMSEA [CI]           | SRMR | CFI (nullRMSEA) | AIC       | df | $\chi^2$ (p)    | Standardized Factor Loading |                      |        |             |
|---------------------------------------|----------------------|------|-----------------|-----------|----|-----------------|-----------------------------|----------------------|--------|-------------|
|                                       |                      |      |                 |           |    |                 | Item                        | T-Pre1               | T-Pre2 | T-Pre3      |
| <b>Externalizing Problem Behavior</b> | .045<br>[.041, .048] | .044 | .908 (.126)     | 43961.892 | 67 | 468.39 (< .001) | F1: ext0102                 | .397                 |        | .469        |
|                                       |                      |      |                 |           |    |                 | F1: ext0103r                | .722                 |        | .405        |
|                                       |                      |      |                 |           |    |                 | F1: ext0104r                | .813                 |        | .639        |
|                                       |                      |      |                 |           |    |                 | F2: ext0105                 | .402                 |        | .496        |
|                                       |                      |      |                 |           |    |                 | F2: ext0107                 | .459                 |        | .343        |
|                                       |                      |      |                 |           |    |                 | F2: ext0108                 | .480                 |        | .317        |
|                                       |                      |      |                 |           |    |                 | F2: ext0109                 | .340                 |        | .379        |
|                                       |                      |      |                 |           |    |                 | <b>HOF loading</b>          |                      |        |             |
|                                       |                      |      |                 |           |    |                 | <b>F1</b>                   | <b>.658</b>          |        | <b>.612</b> |
| <b>F2</b>                             | <b>.701</b>          |      | <b>.619</b>     |           |    |                 |                             |                      |        |             |
| <b>Coping Styles (SVF-KJ)</b>         | .053<br>[.040, .066] | .045 | .946 (.177)     | 23558.791 | 17 | 68.48 (< .001)  | S-C: svk0100                |                      | .556   |             |
|                                       |                      |      |                 |           |    |                 | S-C: svk0103                |                      | .745   |             |
|                                       |                      |      |                 |           |    |                 | S-C: svk0106                |                      | .695   |             |
|                                       |                      |      |                 |           |    |                 | T/R: svk0104                |                      | .345   |             |
|                                       |                      |      |                 |           |    |                 | T/R: svk0107                |                      | 1.083  |             |
|                                       |                      |      |                 |           |    |                 | Dis: svk0102                |                      | .323   |             |
|                                       |                      |      |                 |           |    |                 | Dis: svk0105                |                      | .660   |             |
|                                       |                      |      |                 |           |    |                 | Dis: svk0108                |                      | .534   |             |
|                                       |                      |      |                 |           |    |                 | <b>Coping Styles (CISS)</b> | .057<br>[.048, .066] | .044   | .929 (.174) |
| T-O: cis0103                          |                      | .656 |                 |           |    |                 |                             |                      |        |             |
| T-O: cis0106                          |                      | .500 |                 |           |    |                 |                             |                      |        |             |
| Emo: cis0101                          |                      | .337 |                 |           |    |                 |                             |                      |        |             |
| Emo: cis0104                          |                      | .602 |                 |           |    |                 |                             |                      |        |             |
| Emo: cis0107                          |                      | .738 |                 |           |    |                 |                             |                      |        |             |
| Dis: cis0102                          |                      | .290 |                 |           |    |                 |                             |                      |        |             |
| Dis: cis0105                          |                      | .762 |                 |           |    |                 |                             |                      |        |             |
| Dis: cis0108                          |                      | .771 |                 |           |    |                 |                             |                      |        |             |

Note. nullRMSEA = baseline RMSEA; T-Pre1/2/3 = pre-pandemic survey 1/2/3; HOF = higher-order factor; S-C = Self-Control; T/R = Thoughts/Resignation; Dis = Distraction; T-O = Task-Orientation; Emo = Emotional. Missing data handled with full information maximum likelihood estimation. We allowed residual covariances of the same item between time points. Standardized factor loadings with first item of latent group set as reference. Baseline RMSEA only reported when CFI was low (CFI not interpreted and in grayscale when baseline RMSEA < .158).

**Supplement D: Augmented Backward Elimination and Control Analyses****Table E21.** Results of the Regression Analyses Based on Twin 1

| Model Characteristic            | Applied on Twin 1 |              |         |        |        |                  | Applied on Twin 2 |              |         |        |        |                  |
|---------------------------------|-------------------|--------------|---------|--------|--------|------------------|-------------------|--------------|---------|--------|--------|------------------|
|                                 | $\beta$           | $SE_{\beta}$ | $r_s^2$ | unique | common | $p$              | $\beta$           | $SE_{\beta}$ | $r_s^2$ | unique | common | $p$              |
| Intercept                       | <b>-.367</b>      | .093         |         |        |        | <b>&lt; .001</b> | <b>-.327</b>      | .098         |         |        |        | <b>&lt; .001</b> |
| <b>Regression Variables</b>     |                   |              |         |        |        |                  |                   |              |         |        |        |                  |
| <b>Independent Variables</b>    |                   |              |         |        |        |                  |                   |              |         |        |        |                  |
| <b>Pre-Pandemic DS</b>          | <b>.212</b>       | .036         | .854    | .024   | .117   | <b>&lt; .001</b> | <b>.178</b>       | .037         | .798    | .021   | .086   | <b>&lt; .001</b> |
| <b>Life Satisfaction</b>        | <b>-.066</b>      | .035         | -.599   | .002   | .068   | <b>.031</b>      | <b>-.107</b>      | .035         | -.600   | .006   | .049   | <b>.001</b>      |
| Optimism                        | <b>-.063</b>      | .030         | -.532   | .004   | .053   | <b>.020</b>      | -.038             | .032         | -.475   | .001   | .033   | .110             |
| <b>Internalizing Behavior</b>   | <b>.108</b>       | .034         | .746    | .006   | .097   | <b>.001</b>      | <b>.103</b>       | .035         | .724    | .006   | .077   | <b>.002</b>      |
| <b>Openness</b>                 | <b>.063</b>       | .027         | .085    | .005   | -.003  | <b>.021</b>      | <b>.058</b>       | .028         | .056    | .005   | -.003  | <b>.037</b>      |
| Conscientiousness               | <b>-.076</b>      | .031         | -.253   | .005   | .009   | <b>.017</b>      | -.001             | .032         | -.218   | .000   | .008   | .970             |
| Agreeableness                   | <b>.102</b>       | .029         | .090    | .008   | -.007  | <b>&lt; .001</b> | -.005             | .030         | -.119   | .000   | .001   | .865             |
| <b>Control Variables</b>        |                   |              |         |        |        |                  |                   |              |         |        |        |                  |
| Age                             | -.055             | .029         | -.119   | .001   | .000   | .057             | <b>-.154</b>      | .029         | -.259   | .018   | .009   | <b>&lt; .001</b> |
| Sex                             | <b>.107</b>       | .057         | .422    | .009   | .022   | <b>&lt; .001</b> | <b>.111</b>       | .059         | .388    | .011   | .014   | <b>&lt; .001</b> |
| COVID-19 infection (household)  | .029              | .088         | .045    | .000   | -.000  | .264             | -.005             | .087         | .011    | .000   | -.000  | .860             |
| COVID-19 quarantine (household) | .026              | .062         | .096    | .000   | .001   | .320             | <b>-.060</b>      | .063         | -.111   | .000   | -.002  | <b>.027</b>      |
| <b>Model statistics</b>         |                   |              |         |        |        |                  |                   |              |         |        |        |                  |
| $n$                             | 1,229             |              |         |        |        |                  | 1,205             |              |         |        |        |                  |
| $F$                             | 23.88             |              |         |        |        |                  | 20.26             |              |         |        |        |                  |
| $df$                            | 1217              |              |         |        |        |                  | 1193              |              |         |        |        |                  |
| $p$                             | <b>&lt; .001</b>  |              |         |        |        |                  | <b>&lt; .001</b>  |              |         |        |        |                  |
| Adjusted $R^2$                  | .170              |              |         |        |        |                  | .150              |              |         |        |        |                  |

Note.  $r_s^2$  = squared structure coefficient (proportion of  $R^2$  variance explained by the predictor, i. e.  $r^2/R^2$ ); unique = proportion of criterion variance uniquely explained by the predictor; common = proportion of criterion variance explained by the predictor as well as (an)other predictor(s); DS = depression symptoms. Dependent variable stable trait component of pandemic depression symptoms (DS). Variable selection using Augmented Backwards Elimination (ABE) following Dunkler et al. (2014): Full model with independent variables pre-pandemic DS, family socio-economic status, home environment, parental emotional support, self-efficacy, self-esteem, optimism, life satisfaction, internalizing and externalizing problem behavior, Big Five personality traits, positive life events, and the linear and quadratic term of negative life events. Variables were dropped from the model subsequently by combining the selection by significance ( $\alpha = .10$ ) and change-in-estimate criterion ( $\tau = .05$ ), quasi-cross-validated across twins.  $p/2$  for estimates in direction from hypotheses,  $1-p/2$  for estimates in reverse direction of hypotheses. Missing values handled via list-wise deletion, separately for ABE variable selection (on all variables) and on the final model computation. Significant beta coefficients ( $p < .05$ ) are bold-faced.

**Table E22.** Results of the Regression Analyses Based on Twin 2

| Model Characteristic                | Applied on Twin 1 |              |         |        |        |             | Applied on Twin 2 |              |         |        |        |             |
|-------------------------------------|-------------------|--------------|---------|--------|--------|-------------|-------------------|--------------|---------|--------|--------|-------------|
|                                     | $\beta$           | $SE_{\beta}$ | $r_s^2$ | unique | common | $p$         | $\beta$           | $SE_{\beta}$ | $r_s^2$ | unique | common | $p$         |
| Intercept                           | <b>-.453</b>      | .093         |         |        |        | < .001      | <b>-.372</b>      | .096         |         |        |        | < .001      |
| <b>Regression Variables</b>         |                   |              |         |        |        |             |                   |              |         |        |        |             |
| <b>Independent Variables</b>        |                   |              |         |        |        |             |                   |              |         |        |        |             |
| Pre-Pandemic DS                     | <b>.218</b>       | .036         | .875    | .023   | .1066  | < .001      | <b>.167</b>       | .036         | .763    | .019   | .079   | < .001      |
| Self-efficacy                       | .029              | .029         | -.470   | .001   | .035   | .825        | .057              | .029         | -.346   | .004   | .013   | .977        |
| Self-esteem                         | -.053             | .036         | -.732   | .003   | .094   | .078        | <b>-.070</b>      | .037         | -.675   | .003   | .073   | <b>.028</b> |
| Life Satisfaction                   | <b>-.098</b>      | .033         | -.647   | .004   | .067   | <b>.002</b> | <b>-.109</b>      | .035         | -.579   | .005   | .046   | <b>.001</b> |
| Neuroticism                         | <b>.073</b>       | .028         | .541    | .003   | .041   | <b>.005</b> | <b>.109</b>       | .029         | .533    | .007   | .033   | < .001      |
| Positive Life Experiences           | .013              | .014         | .008    | .000   | -.000  | .617        | .036              | .013         | .016    | .001   | -.001  | .156        |
| Negative Life Experiences           | .070              | .020         | .299    | .001   | .015   | .176        | .089              | .018         | .242    | .003   | .007   | .072        |
| Negative Life Experiences (Squared) | -.030             | .002         | .215    | .000   | .009   | .552        | -.069             | .001         | .142    | .002   | .001   | .159        |
| <b>Control Variables</b>            |                   |              |         |        |        |             |                   |              |         |        |        |             |
| Age                                 | <b>-.090</b>      | .027         | -.124   | .004   | -.003  | < .001      | <b>-.194</b>      | .027         | -.289   | .031   | -.019  | < .001      |
| Sex                                 | <b>.116</b>       | .054         | .453    | .010   | .020   | < .001      | <b>.095</b>       | .054         | .371    | .009   | .013   | < .001      |
| COVID-19 infection (household)      | .027              | .083         | .060    | .000   | -.000  | .282        | .002              | .082         | .037    | .000   | .000   | .921        |
| COVID-19 quarantine (household)     | .013              | .059         | .069    | .000   | .000   | .603        | <b>-.066</b>      | .060         | -.112   | .003   | -.002  | <b>.011</b> |
| <b>Model statistics</b>             |                   |              |         |        |        |             |                   |              |         |        |        |             |
| $n$                                 | 1,356             |              |         |        |        |             | 1,325             |              |         |        |        |             |
| $F$                                 | 21.18             |              |         |        |        |             | 19.83             |              |         |        |        |             |
| $df$                                | 1343              |              |         |        |        |             | 1312              |              |         |        |        |             |
| $p$                                 | < .001            |              |         |        |        |             | < .001            |              |         |        |        |             |
| Adjusted $R^2$                      | .152              |              |         |        |        |             | .146              |              |         |        |        |             |

Note.  $r_s^2$  = squared structure coefficient (proportion of  $R^2$  variance explained by the predictor, i. e.  $r^2/R^2$ ); unique = proportion of criterion variance uniquely explained by the predictor; common = proportion of criterion variance explained by the predictor as well as (an)other predictor(s); DS = depression symptoms. Dependent variable stable trait component of pandemic DS. Variable selection via multiple regression using Augmented Backwards Elimination following Dunkler et al. (2014): Full model with independent variables pre-pandemic DS, family socio-economic status, home environment, parental emotional support, self-efficacy, self-esteem, optimism, life satisfaction, internalizing and externalizing problem behavior, Big Five personality traits, positive life events, and the linear and quadratic term of negative life events. Variables were dropped from the model subsequently by combining the selection by significance ( $\alpha = .10$ ) and change-in-estimate criterion ( $\tau = .05$ ), quasi-cross-validated across twins.  $p/2$  for estimates in direction from hypotheses,  $1-p/2$  for estimates in reverse direction of hypotheses. Missing values handled via list-wise deletion, separately for ABE variable selection (on all variables) and on the final model computation. Significant beta coefficients ( $p < .05$ ) are bold-faced.

**Table E23.** Result of the Final Regression Model (Full Sample)

| <b>Model Characteristic</b>     | <b><math>\beta</math></b> | <b><math>SE_{\beta}</math></b> | <b><math>r_s^2</math></b> | <b>unique</b> | <b>common</b> | <b><math>p</math></b> |
|---------------------------------|---------------------------|--------------------------------|---------------------------|---------------|---------------|-----------------------|
| Intercept                       | <b>-.349</b>              | .068                           |                           |               |               | <b>&lt; .001</b>      |
| <b>Regression Variables</b>     |                           |                                |                           |               |               |                       |
| <b>Independent Variables</b>    |                           |                                |                           |               |               |                       |
| Pre-Pandemic DS                 | <b>.191</b>               | .026                           | .841                      | .022          | .101          | <b>&lt; .001</b>      |
| Life Satisfaction               | <b>-.091</b>              | .024                           | -.611                     | .004          | .059          | <b>&lt; .001</b>      |
| †Optimism                       | <b>-.050</b>              | .022                           | -.515                     | .002          | .043          | <b>.011</b>           |
| Internalizing Problems          | <b>.105</b>               | .025                           | .749                      | .006          | .087          | <b>&lt; .001</b>      |
| Openness                        | <b>.061</b>               | .019                           | .073                      | .005          | -.003         | <b>.002</b>           |
| †Conscientiousness              | -.039                     | .022                           | -.242                     | .002          | .009          | .084                  |
| †Agreeableness                  | <b>.047</b>               | .021                           | -.010                     | .002          | -.002         | <b>.023</b>           |
| <b>Control Variables</b>        |                           |                                |                           |               |               |                       |
| Age                             | <b>-.107</b>              | .021                           | -.192                     | .007          | -.003         | <b>&lt; .001</b>      |
| Sex                             | <b>.111</b>               | .041                           | .415                      | .010          | .018          | <b>&lt; .001</b>      |
| COVID-19 infection (household)  | .008                      | .062                           | .029                      | .000          | .000          | .649                  |
| COVID-19 quarantine (household) | -.019                     | .044                           | -.004                     | .000          | .000          | .314                  |
| <b>Model statistics</b>         |                           |                                |                           |               |               |                       |
| <i>n</i>                        | 2,434                     |                                |                           |               |               |                       |
| <i>F</i>                        | 42.33                     |                                |                           |               |               |                       |
| <i>df</i>                       | 2422                      |                                |                           |               |               |                       |
| <i>p</i>                        | < .001                    |                                |                           |               |               |                       |
| Adjusted $R^2$                  | .157                      |                                |                           |               |               |                       |

*Note.*  $r_s^2$  = squared structure coefficient (proportion of  $R^2$  variance explained by the predictor, i. e.  $r^2/R^2$ ); unique = proportion of criterion variance uniquely explained by the predictor; common = proportion of criterion variance explained by the predictor as well as (an)other predictor(s); DS = depression symptoms. Dependent variable stable trait component of pandemic DS. Missing values handled via list-wise deletion.  $p/2$  for estimates in direction from hypotheses,  $1-p/2$  for estimates in reverse direction of hypotheses. Model with higher explanatory power across both twins chosen for full sample analysis. Effects in the final model were considered meaningful if statistically significant ( $p < .05$ ) across both twins. Significant beta coefficients ( $p < .05$ ) are bold-faced. Variables marked with † were not significant across both twins and were not taken forward into genetically informative analyses.



**Table E24.** Results of the Control Analyses: Final Regression Model with Pre-Pandemic DS Omitted (Full Sample)

| Model Characteristic            | $\beta$      | $SE_{\beta}$ | $r_s^2$ | unique | common | $p$         |
|---------------------------------|--------------|--------------|---------|--------|--------|-------------|
| Intercept                       | -.376        | .068         |         |        |        | < .001      |
| <b>Regression Variables</b>     |              |              |         |        |        |             |
| <b>Independent Variables</b>    |              |              |         |        |        |             |
| Life Satisfaction               | <b>-.152</b> | .023         | -.653   | .015   | .048   | < .001      |
| †Optimism                       | <b>-.077</b> | .022         | -.544   | .005   | .039   | < .001      |
| Internalizing Problems          | <b>.174</b>  | .023         | .799    | .021   | .072   | < .001      |
| Openness                        | <b>.084</b>  | .019         | .081    | .009   | -.007  | < .001      |
| †Conscientiousness              | <b>-.060</b> | .022         | -.259   | .004   | .007   | <b>.009</b> |
| †Agreeableness                  | <b>.042</b>  | .021         | -.016   | .002   | -.002  | <b>.043</b> |
| <b>Control Variables</b>        |              |              |         |        |        |             |
| Age                             | <b>-.102</b> | .021         | -.196   | .007   | -.003  | < .001      |
| Sex                             | <b>.119</b>  | .041         | .444    | .012   | .016   | < .001      |
| COVID-19 infection (household)  | .006         | .062         | .032    | .000   | .000   | .742        |
| COVID-19 quarantine (household) | -.016        | .045         | -.003   | .000   | -.000  | .399        |
| <b>Model statistics</b>         |              |              |         |        |        |             |
| $n$                             |              | 2,437        |         |        |        |             |
| $F$                             |              | 40.13        |         |        |        |             |
| $df$                            |              | 2426         |         |        |        |             |
| $p$                             |              | < .001       |         |        |        |             |
| Adjusted $R^2$                  |              | .138         |         |        |        |             |

*Note.*  $r_s^2$  = squared structure coefficient (proportion of  $R^2$  variance explained by the predictor, i. e.  $r^2/R^2$ ); unique = proportion of criterion variance uniquely explained by the predictor; common = proportion of criterion variance explained by the predictor as well as (an)other predictor(s); DS = depression symptoms. Dependent variable stable trait component of pandemic DS. Missing values handled via list-wise deletion.  $p/2$  for estimates in direction from hypotheses,  $1-p/2$  for estimates in reverse direction of hypotheses. Significant beta coefficients ( $p < .05$ ) are bold-faced. Control analysis performed to check for possible interference from pre-pandemic DS (none to be found).

**Table E25.** Results of the Control Analyses: Pre-Pandemic Depression Symptoms as Criterion

| Model Characteristic         | Twin 1 ABE Model                           |              |         |       | Twin 2 ABE Model                           |              |         |       | Final Model                   |              |         |       |
|------------------------------|--------------------------------------------|--------------|---------|-------|--------------------------------------------|--------------|---------|-------|-------------------------------|--------------|---------|-------|
|                              | $\beta$                                    | $SE_{\beta}$ | $r_s^2$ | $p$   | $\beta$                                    | $SE_{\beta}$ | $r_s^2$ | $p$   | $\beta$                       | $SE_{\beta}$ | $r_s^2$ | $p$   |
| <i>Intercept</i>             | .006                                       | .069         |         | .933  | .004                                       |              |         | .956  | -.028                         |              |         | .566  |
| <b>Regression Variables</b>  |                                            |              |         |       |                                            |              |         |       |                               |              |         |       |
| <b>Independent Variables</b> |                                            |              |         |       |                                            |              |         |       |                               |              |         |       |
| Life Satisfaction            | <b>-.151</b>                               | .026         | -.758   | <.001 | <b>-.138</b>                               | .095         | -.734   | <.001 | <b>-.145</b>                  | .019         | -.747   | <.001 |
| Optimism                     | <b>-.066</b>                               | .022         | -.567   | .001  | <b>-.087</b>                               | .027         | -.562   | .001  | <b>-.075</b>                  | .016         | -.566   | <.001 |
| Internalizing Behavior       | <b>.283</b>                                | .024         | .777    | <.001 | <b>.280</b>                                | .023         | .772    | <.001 | <b>.285</b>                   | .018         | .777    | <.001 |
| Self-Efficacy                | <b>-.083</b>                               | .024         | -.593   | <.001 | <b>-.079</b>                               | .025         | -.495   | <.001 | <b>-.080</b>                  | .017         | -.548   | <.001 |
| Self-Esteem                  | <b>-.374</b>                               | .024         | -.873   | <.001 | <b>-.374</b>                               | .024         | -.876   | <.001 | <b>-.372</b>                  | .018         | -.875   | <.001 |
| Negative Life Events         | <b>.053</b>                                | .007         | .255    | .004  | <b>.039</b>                                | .007         | .235    | .049  | <b>.047</b>                   | .005         | .231    | <.001 |
| Openness                     | <b>.104</b>                                | .020         | -.043   | <.001 | <b>.095</b>                                | .024         | -.046   | <.001 | <b>.104</b>                   | .017         | -.041   | <.001 |
| Conscientiousness            | <b>-.080</b>                               | .021         | -.306   | .001  | <b>-.062</b>                               | .022         | -.222   | .007  | <b>-.073</b>                  | .016         | -.268   | <.001 |
| Extraversion                 |                                            |              |         |       | .048                                       | .026         | -.232   | .072  | .019                          | .018         | -.234   | .295  |
| Parental Support             |                                            |              |         |       | .069                                       | .020         | -.151   | .996  | .038                          | .015         | -.193   | .995  |
| Parental Support             |                                            |              |         |       | <b>.067</b>                                |              |         | .001  | <b>.039</b>                   |              |         | .011  |
| <b>Control Variables</b>     |                                            |              |         |       |                                            |              |         |       |                               |              |         |       |
| Age                          | .007                                       | .004         | .014    | .712  | <b>.057</b>                                | .004         | .110    | .009  | .033                          | .003         | .060    | .117  |
| Sex                          | -.023                                      | .041         | .180    | .258  | -.003                                      | .042         | .193    | .876  | -.013                         | .030         | .188    | .514  |
| <b>Model statistics</b>      | <b>↑ Coefficients as Applied on Twin 1</b> |              |         |       | <b>↑ Coefficients as Applied on Twin 2</b> |              |         |       | <b>Applied on Full Sample</b> |              |         |       |
| <i>n</i>                     | 1,269                                      |              | 1,250   |       | 1,255                                      |              | 1,235   |       | 2,490                         |              |         |       |
| <i>F</i>                     | 185.30                                     |              | 147.00  |       | 151.30                                     |              | 123.60  |       | 273.30                        |              |         |       |
| <i>df</i>                    | 1258                                       |              | 1239    |       | 1242                                       |              | 1222    |       | 2477                          |              |         |       |
| <i>p</i>                     | <.001                                      |              | <.001   |       | <.001                                      |              | <.001   |       | <.001                         |              |         |       |
| Adjusted $R^2$               | .592                                       |              | .539    |       | .588                                       |              | .544    |       | .567                          |              |         |       |

*Note.* ABE = augmented backward elimination;  $r_s^2$  = squared structure coefficient (proportion of  $R^2$  variance explained by the predictor, i. e.  $r^2/R^2$ ). Dependent variable stable trait component of pandemic DS. Variable selection from separate Augmented Backward Elimination (applied on the full model with pre-pandemic depression symptoms as criterion) following Dunkler et al. (2014): Independent variables pre-pandemic DS, family socio-economic status, home environment, parental emotional support, self-efficacy, self-esteem, optimism, life satisfaction, internalizing and externalizing problem behavior, Big Five personality traits, positive life events, and the linear and quadratic term of negative life events. Variables were dropped from the model subsequently by combining the selection by significance ( $\alpha = .10$ ) and change-in-estimate criterion ( $\tau = .05$ ), quasi-cross-validated across twins. Model shows a major increase in explanatory power when compared to pandemic DS and includes more relevant predictors compared to the ABE on pandemic DS (cf. Tables E21, E22, E23).  $p/2$  for estimates in direction from hypotheses,  $1-p/2$  for estimates in reverse direction of hypotheses. Results quasi-cross-validated across twins (co-twin coefficients omitted). Beta coefficients bold-faced when significant ( $p < .05$ ) across both twins.

**Table E26.** Results of the Control Analyses: Separate Surveys

| Model Characteristic                              | T-Cov1<br>(06–11/2020) |              |         |        | T-Cov2<br>(11/2020–04/2021) |              |         |        | T-Cov3<br>(09–11/2021) |              |         |        |
|---------------------------------------------------|------------------------|--------------|---------|--------|-----------------------------|--------------|---------|--------|------------------------|--------------|---------|--------|
|                                                   | $\beta$                | $SE_{\beta}$ | $r_s^2$ | $p$    | $\beta$                     | $SE_{\beta}$ | $r_s^2$ | $p$    | $\beta$                | $SE_{\beta}$ | $r_s^2$ | $p$    |
| Intercept                                         | .141                   | .263         |         | .592   | -.209                       | .083         |         | .012   | -.126                  | .627         |         | .840   |
| <b>Regression Variables</b>                       |                        |              |         |        |                             |              |         |        |                        |              |         |        |
| <b>Independent Variables</b><br>(from twin 1 ABE) |                        |              |         |        |                             |              |         |        |                        |              |         |        |
| Pre-Pandemic DS                                   | <b>.150</b>            | .040         | .827    | < .001 | <b>.177</b>                 | .027         | .793    | < .001 | <b>.173</b>            | .039         | .841    | < .001 |
| Life Satisfaction                                 | -.059                  | .037         | -.611   | .057   | -.094                       | .026         | -.562   | < .001 | -.114                  | .038         | -.664   | .001   |
| Optimism                                          | -.081                  | .035         | -.598   | .010   | -.023                       | .023         | -.446   | .165   | -.039                  | .033         | -.483   | .108   |
| Internalizing Behavior                            | <b>.121</b>            | .038         | .766    | < .001 | <b>.068</b>                 | .026         | .685    | .005   | <b>.144</b>            | .036         | .794    | < .001 |
| Openness                                          | <b>.079</b>            | .030         | .102    | .010   | <b>.043</b>                 | .021         | .076    | .040   | .051                   | .029         | .048    | .084   |
| Conscientiousness                                 | -.041                  | .034         | -.250   | .234   | -.031                       | .024         | -.212   | .195   | -.007                  | .035         | -.274   | .845   |
| Agreeableness                                     | <b>.078</b>            | .033         | .129    | .014   | <b>.063</b>                 | .022         | .054    | .004   | -.039                  | .031         | -.187   | .219   |
| <b>Control Variables</b>                          |                        |              |         |        |                             |              |         |        |                        |              |         |        |
| Age                                               | -.068                  | .031         | -.155   | .030   | -.118                       | .022         | -.230   | < .001 | -.086                  | .032         | -.196   | .006   |
| Sex                                               | .043                   | .062         | .293    | .165   | <b>.115</b>                 | .043         | .447    | < .001 | <b>.096</b>            | .062         | .342    | .002   |
| COVID-19 infection<br>(household)                 | -.038                  | .095         | -.122   | .181   | .022                        | .065         | .075    | .267   | .046                   | .084         | .051    | .088   |
| COVID-19 quarantine<br>(household)                | -.003                  | .066         | .068    | .931   | -.022                       | .047         | -.029   | .274   | -.009                  | .063         | .043    | .765   |
| Seven-day Incidence Rate                          | .023                   | .003         | .030    | .552   | -.041                       | .000         | -.204   | .062   | .022                   | .000         | .013    | .527   |
| Survey Month                                      | -.041                  | .033         | -.039   | .291   | -.054                       | .005         | -.178   | .016   | -.011                  | .064         | -.045   | .747   |
| <b>Model statistics</b>                           |                        |              |         |        |                             |              |         |        |                        |              |         |        |
| $n$                                               | 1,096                  |              |         |        | 2,239                       |              |         |        | 1,089                  |              |         |        |
| $F$                                               | 12.12                  |              |         |        | 25.75                       |              |         |        | 17.85                  |              |         |        |
| $df$                                              | 1082                   |              |         |        | 2225                        |              |         |        | 1075                   |              |         |        |
| $p$                                               | < .001                 |              |         |        | < .001                      |              |         |        | < .001                 |              |         |        |
| Adjusted $R^2$                                    | .117                   |              |         |        | .126                        |              |         |        | .168                   |              |         |        |

Note.  $r_s^2$  = squared structure coefficient (proportion of  $R^2$  variance explained by the predictor, i. e.  $r^2/R^2$ ); DS = depression symptoms. Dependent variable stable trait component of pandemic DS during each considered pandemic wave (T-Cov1, 2, 3). Independent variables are trait regression scores as in the main analyses. Variable selection from pandemic DS model ABE on twin 1. A separate variable selection has not been performed to ensure comparability. Separate list-wise missing deletion by survey.  $p/2$  for estimates in direction from hypotheses,  $1-p/2$  for estimates in reverse direction of hypotheses. Control variables for seven-day incidence rate and survey month added. Beta coefficients bold-faced when significant ( $p < .05$ ) across both twins.

**Table E27.** Results of the Control Analyses: Augmented Backward Elimination With the State Scores of the Third Pre-Pandemic Survey

| <b>Model Characteristic</b>     | <b><math>\beta</math></b> | <b><math>SE_{\beta}</math></b> | <b><math>r_s^2</math></b> | <b>unique</b> | <b>common</b> | <b><math>p</math></b> |
|---------------------------------|---------------------------|--------------------------------|---------------------------|---------------|---------------|-----------------------|
| Intercept                       | <b>-.351</b>              | .069                           |                           |               |               | <b>&lt; .001</b>      |
| <b>Regression Variables</b>     |                           |                                |                           |               |               |                       |
| <b>Independent Variables</b>    |                           |                                |                           |               |               |                       |
| Pre-pandemic DS                 | <b>.141</b>               | .084                           | .815                      | .010          | .112          | <b>&lt; .001</b>      |
| Self-esteem                     | <b>-.056</b>              | .047                           | -.713                     | .003          | .094          | <b>.018</b>           |
| Life satisfaction               | <b>-.079</b>              | .035                           | -.634                     | .003          | .070          | <b>.001</b>           |
| Optimism                        | <b>-.077</b>              | .020                           | -.507                     | .005          | .040          | <b>&lt; .001</b>      |
| Internalizing Behavior          | <b>.092</b>               | .155                           | .772                      | .005          | .101          | <b>&lt; .001</b>      |
| Openness                        | <b>.053</b>               | .035                           | -.016                     | .004          | -.004         | <b>.006</b>           |
| Neuroticism                     | <b>.055</b>               | .035                           | .609                      | .001          | .059          | <b>.011</b>           |
| Positive life events            | <b>.042</b>               | .010                           | .015                      | .001          | -.001         | <b>.023</b>           |
| <b>Control Variables</b>        |                           |                                |                           |               |               |                       |
| Age                             | <b>-.107</b>              | .019                           | -.190                     | .008          | -.004         | <b>&lt; .001</b>      |
| Sex                             | <b>.096</b>               | .040                           | .405                      | .008          | .020          | <b>&lt; .001</b>      |
| COVID-19 infection (household)  | .011                      | .062                           | .022                      | .000          | -.000         | 538                   |
| COVID-19 quarantine (household) | -.020                     | .044                           | -.003                     | .001          | -.001         | .288                  |
| <b>Model statistics</b>         |                           |                                |                           |               |               |                       |
| $n$                             | 2,434                     |                                |                           |               |               |                       |
| $F$                             | 40.71                     |                                |                           |               |               |                       |
| $df$                            | 2418                      |                                |                           |               |               |                       |
| $p$                             | < .001                    |                                |                           |               |               |                       |
| Adjusted $R^2$                  | .164                      |                                |                           |               |               |                       |

*Note.*  $r_s^2$  = squared structure coefficient (proportion of  $R^2$  variance explained by the predictor, i. e.  $r^2/R^2$ ); unique = proportion of criterion variance uniquely explained by the predictor; common = proportion of criterion variance explained by the predictor as well as (an)other predictor(s); DS = depression symptoms. Variable selection from separate Augmented Backward Elimination (applied with wave 3 state scores where available, the pre-pandemic survey closest to the start of the pandemic) following Dunkler et al. (2014): Independent variables pre-pandemic DS, family socio-economic status, home environment, parental emotional support, self-efficacy, self-esteem, optimism, life satisfaction, internalizing and externalizing problem behavior, Big Five personality traits, positive life events, and the linear and quadratic term of negative life events. Variables were dropped from the model subsequently by combining the selection by significance ( $\alpha = .10$ ) and change-in-estimate criterion ( $\tau = .05$ ), quasi-cross-validated across twins. Model shows that even fewer factors remain in the model, yielding similarly low explanatory power compared to the main analysis with time-stable trait scores. Dependent variable stable trait component of pandemic DS. Missing values handled via list-wise deletion.  $p/2$  for estimates in direction from hypotheses,  $1-p/2$  for estimates in reverse direction of hypotheses. Significant beta coefficients ( $p < .05$ ) are bold-faced.

**Table E28.** Results of the Control Analyses: Regression Models From ABE With  $\alpha = .20$  and With All Considered Variables Included

| Model Characteristic               | Full Model<br>(All Variables Included) |              |             | ABE With $\alpha = .20$ |              |             |
|------------------------------------|----------------------------------------|--------------|-------------|-------------------------|--------------|-------------|
|                                    | $\beta$                                | $SE_{\beta}$ | $p$         | $\beta$                 | $SE_{\beta}$ | $p$         |
| Intercept                          | .012                                   | .097         | .900        | .036                    | .101         | .722        |
| <b>Regression Variables</b>        |                                        |              |             |                         |              |             |
| <b>Independent Variables</b>       |                                        |              |             |                         |              |             |
| Pre-Pandemic DS                    | <b>.171</b>                            | .028         | < .001      | <b>.172</b>             | .029         | < .001      |
| Self-efficacy                      | .042                                   | .024         | .960        | .047                    | .024         | .974        |
| Self-esteem                        | <b>-.061</b>                           | .027         | <b>.013</b> | <b>-.062</b>            | .028         | <b>.013</b> |
| Life satisfaction                  | <b>-.073</b>                           | .026         | <b>.003</b> | <b>-.069</b>            | .028         | <b>.007</b> |
| Optimism                           | <b>-.051</b>                           | .022         | <b>.010</b> | <b>-.050</b>            | .022         | <b>.012</b> |
| Internalizing Behavior             | <b>.108</b>                            | .025         | < .001      | <b>.093</b>             | .030         | <b>.001</b> |
| Openness                           | <b>.049</b>                            | .020         | <b>.016</b> | .040                    | .024         | .102        |
| Conscientiousness                  | <b>-.052</b>                           | .024         | <b>.029</b> | -.046                   | .025         | .071        |
| Agreeableness                      | <b>.487</b>                            | .021         | <b>.020</b> | <b>.046</b>             | .022         | <b>.036</b> |
| Positive Life Experiences          | .033                                   | .010         | .078        | .033                    | .010         | .087        |
| Negative Life Experiences          | .031                                   | .007         | .109        | .030                    | .007         | .122        |
| Socio-Economic Status              |                                        |              |             | -.005                   | .019         | .388        |
| Home Chaos                         |                                        |              |             | -.004                   | .022         | .571        |
| Parental Emot. Support             |                                        |              |             | -.144                   | .022         | .253        |
| Externalizing Behavior             |                                        |              |             | .013                    | .023         | .573        |
| Extraversion                       |                                        |              |             | .013                    | .026         | .613        |
| Neuroticism                        |                                        |              |             | .028                    | .025         | .131        |
| <b>Control Variables</b>           |                                        |              |             |                         |              |             |
| Age                                | <b>-.123</b>                           | .004         | < .001      | <b>-.128</b>            | .005         | < .001      |
| Sex                                | <b>.107</b>                            | .042         | < .001      | <b>.105</b>             | .042         | < .001      |
| COVID-19 infection<br>(household)  | .007                                   | .062         | .689        | .006                    | .062         | .732        |
| COVID-19 quarantine<br>(household) | -.027                                  | .045         | .154        | -.028                   | .045         | .145        |
| <b>Model statistics</b>            |                                        |              |             |                         |              |             |
| $n$                                |                                        | 2,398        |             |                         | 2,398        |             |
| $F$                                |                                        | 31.90        |             |                         | 22.87        |             |
| $df$                               |                                        | 2382         |             |                         | 2376         |             |
| $p$                                |                                        | < .001       |             |                         | < .001       |             |
| Adjusted $R^2$                     |                                        | .162         |             |                         | .161         |             |

Note. DS = depression symptoms. Dependent variable stable trait component of pandemic DS. Variable selection via multiple regression using Augmented Backwards Elimination following Dunkler et al. (2014): Variables were dropped from the full model subsequently by combining the selection by significance ( $\alpha = .20$ ) and change-in-estimate criterion ( $\tau = .05$ ) across both twins. Missing values handled via list-wise deletion.  $p/2$  for estimates in direction from hypotheses,  $1-p/2$  for estimates in reverse direction of hypotheses. Significant beta coefficients ( $p < .05$ ) are bold-faced.

**Table E29.** Results of the Control Analyses: Regression Model Excluding Participants Ever Infected

| Model Characteristic            | Final Model (see Table E23) |              |         |        |        |        |
|---------------------------------|-----------------------------|--------------|---------|--------|--------|--------|
|                                 | $\beta$                     | $SE_{\beta}$ | $r_s^2$ | unique | common | $p$    |
| Intercept                       | -.043                       | .099         |         |        |        | .662   |
| <b>Regression Variables</b>     |                             |              |         |        |        |        |
| <b>Independent Variables</b>    |                             |              |         |        |        |        |
| Pre-Pandemic DS                 | .185                        | .027         | .853    | .021   | .102   | < .001 |
| Life Satisfaction               | -.085                       | .026         | -.623   | .004   | .059   | < .001 |
| Optimism                        | -.054                       | .023         | -.527   | .002   | .042   | .010   |
| Internalizing Problems          | .117                        | .026         | .767    | .008   | .088   | < .001 |
| Openness                        | .075                        | .020         | .114    | .006   | -.004  | < .001 |
| Conscientiousness               | -.042                       | .023         | -.233   | .002   | .008   | .077   |
| Agreeableness                   | .036                        | .022         | -.020   | .001   | -.001  | .096   |
| <b>Control Variables</b>        |                             |              |         |        |        |        |
| Age                             | -.079                       | .004         | -.135   | .004   | -.002  | < .001 |
| Sex                             | .941                        | .043         | .396    | .008   | .018   | < .001 |
| COVID-19 quarantine (household) | -.009                       | .046         | .014    | .000   | -.000  | .658   |
| <b>Model statistics</b>         |                             |              |         |        |        |        |
| $n$                             |                             | 2,193        |         |        |        |        |
| $F$                             |                             | 40.86        |         |        |        |        |
| $df$                            |                             | 2182         |         |        |        |        |
| $p$                             |                             | < .001       |         |        |        |        |
| Adjusted $R^2$                  |                             | .154         |         |        |        |        |

*Note.* DS = depression symptoms. Dependent variable stable trait component of pandemic DS. Variable selection via multiple regression using Augmented Backwards Elimination following Dunkler et al. (2014): Independent variables pre-pandemic DS, family socio-economic status, home environment, parental emotional support, self-efficacy, self-esteem, optimism, life satisfaction, internalizing and externalizing problem behavior, Big Five personality traits, positive life events, and the linear and quadratic term of negative life events. Variables were dropped from the model subsequently by combining the selection by significance ( $\alpha = .10$ ) and change-in-estimate criterion ( $\tau = .05$ ), quasi-cross-validated across twins. Missing values handled via list-wise deletion.  $p/2$  for estimates in direction from hypotheses,  $1-p/2$  for estimates in reverse direction of hypotheses. Significant beta coefficients ( $p < .05$ ) are bold-faced.

**Supplement E: Latent Growth Curve Model and Twin Analyses**

**Table E30.** Results of the Latent Growth Curve Models

| Model Characteristic        | Level-Only Model  |       |          |           | Linear Change Model |       |          |           |
|-----------------------------|-------------------|-------|----------|-----------|---------------------|-------|----------|-----------|
|                             | Est.              | SE    | <i>p</i> | Std. Est. | Est.                | SE    | <i>p</i> | Std. Est. |
| <b>Model parameters</b>     |                   |       |          |           |                     |       |          |           |
| <i>Intercepts</i>           |                   |       |          |           |                     |       |          |           |
| Level                       | 1.811             | 0.011 | < .001   | 4.204     | 1.805               | 0.014 | < .001   | 4.178     |
| Slope                       |                   |       |          |           | 0.012               | 0.019 | .532     | 0.063     |
| Level-slope covariance      |                   |       |          |           | -0.009              | 0.024 | .720     | -0.105    |
| <i>Variances</i>            |                   |       |          |           |                     |       |          |           |
| T-Cov1                      | 0.222             | 0.013 | < .001   | 0.545     | 0.215               | 0.020 | < .001   | 0.536     |
| T-Cov2                      | 0.222             | 0.011 | < .001   | 0.544     | 0.223               | 0.011 | < .001   | 0.544     |
| T-Cov3                      | 0.249             | 0.014 | < .001   | 0.573     | 0.224               | 0.031 | < .001   | 0.512     |
| Level                       | 0.186             | 0.010 | < .001   | 1         | 0.187               | 0.020 | < .001   | 1         |
| Slope                       |                   |       |          |           | 0.036               | 0.047 | .438     | 1         |
| <b>Model fit statistics</b> |                   |       |          |           |                     |       |          |           |
| $\chi^2$                    | 4.653             |       |          |           | 3.392               |       |          |           |
| <i>df</i>                   | 4                 |       |          |           | 1                   |       |          |           |
| <i>p</i>                    | .325              |       |          |           | .066                |       |          |           |
| AIC                         | 9432.091          |       |          |           | 9436.829            |       |          |           |
| CFI                         | .999              |       |          |           | .995                |       |          |           |
| RMSEA [90% CI]              | .008 [.000, .030] |       |          |           | .029 [.000, .065]   |       |          |           |

*Note.* T-Cov1,2,3 = pandemic measurements; Est. = estimates; Std. Est. = standardized estimates. Results are based on unweighted data.

**Table E31.** Result of the Cholesky Decomposition Model Comparison

| Model      | EP        | -2LL               | $\Delta$ -2LL   | $\Delta$ <i>df</i> | <i>p</i> | AIC            | $\Delta$ AIC | wAIC            |
|------------|-----------|--------------------|-----------------|--------------------|----------|----------------|--------------|-----------------|
| ACE        | 21        | 7967056.159        |                 |                    |          | 7967098        |              | .00             |
| <b>ADE</b> | <b>21</b> | <b>7966698.201</b> | <b>-357.959</b> | <b>0</b>           |          | <b>7966740</b> | <b>-358</b>  | <b>&gt; .99</b> |
| DE         | 15        | 7971037.687        | 3981.528        | 6                  | < .001   | 7971068        | 3970         | .00             |
| AE         | 15        | 7968844.147        | 1787.988        | 6                  | < .001   | 7968874        | 1776         | .00             |
| E          | 9         | 8113806.712        | 146750.553      | 12                 | < .001   | 8113825        | 146727       |                 |

*Note.* EP = estimated parameters; wAIC = rounded Akaike weights. Models compared against the ACE model. The chosen model is bold-faced.

**Table E32.** Parameter Estimates of the Cholesky ADE Model

| T      | A <sub>1</sub>                         | A <sub>2</sub>                         | A <sub>3</sub>                          | D <sub>1</sub>                         | D <sub>2</sub>                           | D <sub>3</sub>                         | E <sub>1</sub>                         | E <sub>2</sub>                         | E <sub>3</sub>                         |
|--------|----------------------------------------|----------------------------------------|-----------------------------------------|----------------------------------------|------------------------------------------|----------------------------------------|----------------------------------------|----------------------------------------|----------------------------------------|
| T-Cov1 | 0.292<br>[0.285, 0.298]<br><b>.472</b> |                                        |                                         | 0.164<br>[0.153, 0.175]<br><b>.265</b> |                                          |                                        | 0.519<br>[0.518, 0.521]<br><b>.841</b> |                                        |                                        |
| T-Cov2 | 0.139<br>[0.130, 0.148]<br><b>.223</b> | 0.276<br>[0.271, 0.281]<br><b>.442</b> |                                         | 0.233<br>[0.224, 0.242]<br><b>.373</b> | 0.001<br>[-0.021, 0.023]<br><b>.000</b>  |                                        | 0.153<br>[0.152, 0.155]<br><b>.246</b> | 0.465<br>[0.464, 0.466]<br><b>.745</b> |                                        |
| T-Cov3 | 0.167<br>[0.157, 0.176]<br><b>.258</b> | 0.138<br>[0.129, 0.147]<br><b>.214</b> | 0.000<br>[-0.020, 0.020]<br><b>.000</b> | 0.206<br>[0.191, 0.220]<br><b>.318</b> | 0.026<br>[-0.469, 0.520]<br><b>-.400</b> | 0.258<br>[0.211, 0.306]<br><b>.041</b> | 0.136<br>[0.134, 0.139]<br><b>.211</b> | 0.075<br>[0.073, 0.077]<br><b>.116</b> | 0.486<br>[0.485, 0.488]<br><b>.753</b> |

Note. T = measurement point; T-Cov1,2,3 = pandemic measurements; A<sub>1,2,3</sub> = additive genetic factors at Cov1,2,3; E<sub>1,2,3</sub> = unique environmental factors at T1,2,3. Standardized estimates are bold-faced. Likelihood-based confidence intervals are shown in brackets.

**Table E33.** Result of the Comparison of the Cholesky and Common Factor Model

| Model               | EP | -2LL        | Δ-2LL    | Δdf | p      | AIC     | ΔAIC | wAIC  |
|---------------------|----|-------------|----------|-----|--------|---------|------|-------|
| Cholesky model      | 21 | 7966698.196 |          |     |        | 7966740 |      | > .99 |
| Common factor model | 15 | 7970256.695 | 3558.500 | 7   | < .001 | 7970287 | 3547 | .00   |

Note. EP = estimated parameters; wAIC = rounded Akaike weights.



**Table E34.** Result of the Cholesky Decomposition Model Including Predictors

| Parameter                             | DSprep                              | Life Satisfaction                       | Internalizing Behavior                  | Openness to Experience                  | DScov1                                  | DScov2                                  | DScov3                                  |
|---------------------------------------|-------------------------------------|-----------------------------------------|-----------------------------------------|-----------------------------------------|-----------------------------------------|-----------------------------------------|-----------------------------------------|
| <i>A</i> <sub>DSprep</sub>            | .579<br>[.573, .585]<br><b>.575</b> | -.556<br>[-.561, -.551]<br><b>-.553</b> | .560<br>[.555, .566]<br><b>.558</b>     | .040<br>[.032, .048]<br><b>.040</b>     | .310<br>[.302, .318]<br><b>.307</b>     | .389<br>[.381, .397]<br><b>.390</b>     | .397<br>[.388, .407]<br><b>.395</b>     |
| <i>D</i> <sub>DSprep</sub>            | .330<br>[.319, .341]<br><b>.328</b> | .026<br>[.014, .037]<br><b>.025</b>     | .098<br>[.084, .112]<br><b>.097</b>     | -.007<br>[-.022, .008]<br><b>-.007</b>  | -.024<br>[-.040, -.007]<br><b>-.024</b> | -.021<br>[-.039, -.003]<br><b>-.021</b> | .019<br>[-.002, .040]<br><b>.019</b>    |
| <i>E</i> <sub>DSprep</sub>            | .753<br>[.752, .754]<br><b>.749</b> | -.345<br>[-.347, -.344]<br><b>-.343</b> | .278<br>[.276, .279]<br><b>.277</b>     | -.068<br>[-.070, -.066]<br><b>-.068</b> | .109<br>[.106, .112]<br><b>.108</b>     | .043<br>[.041, .045]<br><b>.043</b>     | .120<br>[.117, .123]<br><b>.119</b>     |
| <i>A</i> <sub>Life Satisfaction</sub> |                                     | .428<br>[.422, .434]<br><b>.425</b>     | -.062<br>[-.069, -.054]<br><b>-.061</b> | .146<br>[.137, .156]<br><b>.146</b>     | .209<br>[.200, .219]<br><b>.207</b>     | .201<br>[.193, .210]<br><b>.202</b>     | .140<br>[.131, .149]<br><b>.139</b>     |
| <i>D</i> <sub>Life Satisfaction</sub> |                                     | .141<br>[.131, .151]<br><b>.140</b>     | -.087<br>[-.100, -.074]<br><b>-.087</b> | .318<br>[.290, .346]<br><b>.317</b>     | -.130<br>[-.146, -.114]<br><b>-.129</b> | -.329<br>[-.343, -.316]<br><b>-.330</b> | -.211<br>[-.242, -.180]<br><b>-.209</b> |
| <i>E</i> <sub>Life Satisfaction</sub> |                                     | .616<br>[.615, .617]<br><b>.612</b>     | -.082<br>[-.083, -.080]<br><b>-.082</b> | .060<br>[.058, .062]<br><b>.060</b>     | -.115<br>[-.118, -.112]<br><b>-.114</b> | -.035<br>[-.037, -.033]<br><b>-.035</b> | -.108<br>[-.110, -.105]<br><b>-.107</b> |
| <i>A</i> <sub>Internalizing</sub>     |                                     |                                         | .352<br>[.347, .356]<br><b>.350</b>     | -.294<br>[-.303, -.284]<br><b>-.293</b> | -.090<br>[-.100, -.081]<br><b>-.090</b> | -.241<br>[-.252, -.230]<br><b>-.241</b> | -.076<br>[-.086, -.065]<br><b>-.075</b> |
| <i>D</i> <sub>Internalizing</sub>     |                                     |                                         | .107<br>[.099, .116]<br><b>.107</b>     | .450<br>[.423, .477]<br><b>.449</b>     | .101<br>[.085, .117]<br><b>.100</b>     | .042<br>[.022, .061]<br><b>.042</b>     | -.159<br>[-.189, -.129]<br><b>-.158</b> |
| <i>E</i> <sub>Internalizing</sub>     |                                     |                                         | .674<br>[.673, .675]<br><b>.671</b>     | -.056<br>[-.058, -.054]<br><b>-.056</b> | .076<br>[.074, .079]<br><b>.075</b>     | .028<br>[.027, .030]<br><b>.029</b>     | .063<br>[.060, .065]<br><b>.062</b>     |
| <i>A</i> <sub>Openness</sub>          |                                     |                                         |                                         | .085<br>[.065, .105]<br><b>.085</b>     | .294<br>[.279, .308]<br><b>.290</b>     | -.139<br>[-.158, -.120]<br><b>-.139</b> | .025<br>[.010, .040]<br><b>.025</b>     |
| <i>D</i> <sub>Openness</sub>          |                                     |                                         |                                         | .203<br>[.158, .248]<br><b>.202</b>     | .052<br>[.034, .070]<br><b>.051</b>     | .019<br>[-.004, .041]<br><b>.019</b>    | .341<br>[.321, .360]<br><b>.338</b>     |
| <i>E</i> <sub>Openness</sub>          |                                     |                                         |                                         | .730<br>[.728, .731]<br><b>.728</b>     | -.094<br>[-.097, -.091]<br><b>-.093</b> | .013<br>[.011, .015]<br><b>.013</b>     | .053<br>[.050, .056]<br><b>.053</b>     |
| <i>A</i> <sub>DScov1</sub>            |                                     |                                         |                                         |                                         | .000<br>[-.072, .072]<br><b>.000</b>    | .000<br>[-.051, .051]<br><b>.000</b>    | .000<br>[-.021, .021]<br><b>.000</b>    |
| <i>D</i> <sub>DScov1</sub>            |                                     |                                         |                                         |                                         | .000<br>[-.025, .025]<br><b>.000</b>    | .000<br>[-.027, .027]<br><b>.000</b>    | .000<br>[-.048, .048]<br><b>.000</b>    |
| <i>E</i> <sub>DScov1</sub>            |                                     |                                         |                                         |                                         | .847<br>[.844, .849]<br><b>.838</b>     | .245<br>[.242, .247]<br><b>.245</b>     | .193<br>[.189, .196]<br><b>.191</b>     |
| <i>A</i> <sub>DScov2</sub>            |                                     |                                         |                                         |                                         |                                         | .000<br>[-.030, .030]<br><b>.000</b>    | .000<br>[-.019, .019]<br><b>.000</b>    |
| <i>D</i> <sub>DScov2</sub>            |                                     |                                         |                                         |                                         |                                         | .000<br>[-.022, .022]<br><b>.000</b>    | .000<br>[-.049, .049]<br><b>.000</b>    |
| <i>E</i> <sub>DScov2</sub>            |                                     |                                         |                                         |                                         |                                         | .743<br>[.741, .744]<br><b>.744</b>     | .112<br>[.109, .115]<br><b>.111</b>     |

|                 |                                            |
|-----------------|--------------------------------------------|
| $A_{D_{Scov3}}$ | .000<br>[-.019, .019]                      |
| $D_{D_{Scov3}}$ | <b>.000</b><br>.000<br>[-.054, .054]       |
| $E_{D_{Scov3}}$ | <b>.749</b><br>[.747, .751]<br><b>.744</b> |

Note. Standardized estimates are bold-faced. Likelihood-based confidence intervals are shown in brackets.

$DS_{prep}$  = pre-pandemic depression symptoms;

$DS_{cov1,2,3}$  = depression symptoms at pandemic measurements 1,2,3;

$A_x$  = additive genetic component of the subscript variable  $x$ ;

$D_x$  = non-additive genetic component of the subscript variable  $x$ ;

$E_x$  = unique environmental component of the subscript variable  $x$ .

**Table E35.** Phenotypic Twin Correlations of Pandemic and Pre-Pandemic Depression Symptoms

| Variable                                            | Zygoty | $n$ | Raw                |        | Adjusted           |        |
|-----------------------------------------------------|--------|-----|--------------------|--------|--------------------|--------|
|                                                     |        |     | $r$ [95% CI]       | $p$    | $r$ [95% CI]       | $p$    |
| <b>Pandemic Depression Symptoms</b>                 |        |     |                    |        |                    |        |
| Measured in the first survey (T-Cov1)               | MZ     | 200 | .308 [.177, .428]  | < .001 | .280 [.147, .403]  | < .001 |
|                                                     | DZ     | 208 | .156 [.021, .286]  | .020   | .145 [.009, .276]  | .037   |
| Measured in the second survey (T-Cov2)              | MZ     | 562 | .396 [.324, .463]  | < .001 | .370 [.296, .439]  | < .001 |
|                                                     | DZ     | 628 | .188 [.111, .262]  | < .001 | .165 [.088, .240]  | < .001 |
| Measured in the third survey (T-Cov3)               | MZ     | 238 | .398 [.286, .500]  | < .001 | .382 [.267, .485]  | < .001 |
|                                                     | DZ     | 233 | .087 [-.042, .213] | .200   | .071 [-.058, .198] | .278   |
| Stable trait component (across all surveys)         | MZ     | 613 | .395 [.326, .460]  | < .001 | .370 [.299, .436]  | < .001 |
|                                                     | DZ     | 700 | .187 [.115, .258]  | < .001 | .158 [.084, .229]  | .006   |
| <b>Pre-Pandemic Depression Symptoms</b>             |        |     |                    |        |                    |        |
| Measured in the second pre-pandemic survey (T-Pre2) | MZ     | 459 | .405 [.326, .479]  | < .001 | .391 [.311, .466]  | < .001 |
|                                                     | DZ     | 534 | .134 [.050, .216]  | .002   | .117 [.032, .200]  | .007   |
| Measured in the third pre-pandemic survey (T-Pre3)  | MZ     | 435 | .414 [.333, .489]  | < .001 | .408 [.327, .484]  | < .001 |
|                                                     | DZ     | 491 | .169 [.082, .254]  | < .001 | .149 [.061, .234]  | < .001 |
| Stable trait (component across all surveys)         | MZ     | 591 | .463 [.397, .524]  | < .001 | .457 [.390, .518]  | < .001 |
|                                                     | DZ     | 674 | .225 [.151, .295]  | < .001 | .199 [.125, .270]  | < .001 |

Note. MZ = monozygotic; DZ = dizygotic; Adjusted = adjusted for significant sex, age (linear and quadratic), and sexage-interaction effects.

**Table E36.** Control Analyses: Result of the Cholesky Decomposition Model Comparison for Pre-Pandemic Depression Symptoms

| Model      | EP        | -2LL               | Δ-2LL            | Δdf      | p      | AIC            | ΔAIC         | wAIC            |
|------------|-----------|--------------------|------------------|----------|--------|----------------|--------------|-----------------|
| ACE        | 11        | 4846717.846        |                  |          |        | 4846740        |              | .00             |
| <b>ADE</b> | <b>11</b> | <b>4843727.027</b> | <b>-2990.819</b> | <b>0</b> |        | <b>4843749</b> | <b>-2991</b> | <b>&gt; .99</b> |
| DE         | 8         | 4847751.092        | 1033.247         | 3        | < .001 | 4847767        | 1027         | .00             |
| AE         | 8         | 4846717.846        | 0.000            | 3        | > .999 | 4846734        | -6           | .00             |
| E          | 5         | 4992358.493        | 145640.648       | 6        | < .001 | 4992368        | 145629       |                 |

Note. EP = estimated parameters; wAIC = rounded Akaike weights. Models compared against the ACE model. The chosen model is bold-faced.

**Table E37.** Control Analysis: Result of the Cholesky Decomposition Model Including Predictors for Pre-Pandemic Depression Symptoms

| Parameter                             | Openness                | Conscientiousness       | Neg. Life Events           | Internalizing              | Life Satisfaction       | Self-Esteem                | Self-Efficacy           | Optimism                | DSpre2                     | DSpre3                     |
|---------------------------------------|-------------------------|-------------------------|----------------------------|----------------------------|-------------------------|----------------------------|-------------------------|-------------------------|----------------------------|----------------------------|
| <i>A</i> <sub>Openness</sub>          | 0.146<br>[0.142, 0.149] | 0.101<br>[0.096, 0.106] | -0.170<br>[-0.202, -0.138] | -0.150<br>[-0.163, -0.137] | 0.034<br>[0.028, 0.040] | 0.075<br>[0.070, 0.080]    | 0.309<br>[0.298, 0.320] | 0.035<br>[0.029, 0.041] | 0.017<br>[0.011, 0.022]    | -0.005<br>[-0.011, 0.001]  |
|                                       | <b>0.346</b>            | <b>0.220</b>            | <b>-0.066</b>              | <b>-0.149</b>              | <b>0.072</b>            | <b>0.210</b>               | <b>0.305</b>            | <b>0.060</b>            | <b>0.035</b>               | <b>-0.011</b>              |
| <i>D</i> <sub>Openness</sub>          | 0.246<br>[0.244, 0.249] | 0.012<br>[0.008, 0.016] | 0.471<br>[0.453, 0.490]    | -0.035<br>[-0.043, -0.026] | 0.048<br>[0.045, 0.052] | -0.014<br>[-0.017, -0.011] | 0.026<br>[0.018, 0.035] | 0.081<br>[0.077, 0.084] | 0.014<br>[0.011, 0.018]    | 0.013<br>[0.009, 0.017]    |
|                                       | <b>0.584</b>            | <b>0.026</b>            | <b>0.183</b>               | <b>-0.034</b>              | <b>0.103</b>            | <b>-0.040</b>              | <b>0.026</b>            | <b>0.138</b>            | <b>0.030</b>               | <b>0.028</b>               |
| <i>E</i> <sub>Openness</sub>          | 0.309<br>[0.309, 0.310] | 0.053<br>[0.053, 0.054] | -0.118<br>[-0.123, -0.114] | -0.080<br>[-0.082, -0.079] | 0.038<br>[0.037, 0.039] | 0.029<br>[0.028, 0.029]    | 0.214<br>[0.212, 0.215] | 0.061<br>[0.060, 0.062] | -0.033<br>[-0.033, -0.032] | -0.027<br>[-0.028, -0.026] |
|                                       | <b>0.734</b>            | <b>0.116</b>            | <b>-0.046</b>              | <b>-0.080</b>              | <b>0.081</b>            | <b>0.081</b>               | <b>0.211</b>            | <b>0.104</b>            | <b>-0.069</b>              | <b>-0.056</b>              |
| <i>A</i> <sub>Conscientiousness</sub> |                         | 0.122<br>[0.118, 0.125] | -0.178<br>[-0.216, -0.140] | -0.066<br>[-0.082, -0.049] | 0.119<br>[0.112, 0.126] | 0.167<br>[0.163, 0.172]    | 0.076<br>[0.063, 0.088] | 0.118<br>[0.112, 0.124] | -0.139<br>[-0.144, -0.134] | -0.170<br>[-0.175, -0.164] |
|                                       |                         | <b>0.265</b>            | <b>-0.069</b>              | <b>-0.065</b>              | <b>0.253</b>            | <b>0.471</b>               | <b>0.075</b>            | <b>0.202</b>            | <b>-0.293</b>              | <b>-0.356</b>              |
| <i>D</i> <sub>Conscientiousness</sub> |                         | 0.247<br>[0.244, 0.249] | 0.135<br>[0.117, 0.153]    | -0.125<br>[-0.133, -0.117] | 0.097<br>[0.094, 0.101] | 0.001<br>[-0.001, 0.004]   | 0.262<br>[0.255, 0.269] | 0.053<br>[0.049, 0.057] | -0.064<br>[-0.068, -0.061] | -0.063<br>[-0.067, -0.059] |
|                                       |                         | <b>0.536</b>            | <b>0.052</b>               | <b>-0.125</b>              | <b>0.208</b>            | <b>0.004</b>               | <b>0.259</b>            | <b>0.091</b>            | <b>-0.136</b>              | <b>-0.132</b>              |
| <i>E</i> <sub>Conscientiousness</sub> |                         | 0.350<br>[0.350, 0.351] | 0.043<br>[0.038, 0.047]    | -0.088<br>[-0.089, -0.086] | 0.041<br>[0.040, 0.042] | 0.018<br>[0.017, 0.019]    | 0.195<br>[0.193, 0.197] | 0.033<br>[0.032, 0.035] | -0.027<br>[-0.028, -0.026] | -0.035<br>[-0.036, -0.034] |
|                                       |                         | <b>0.762</b>            | <b>0.017</b>               | <b>-0.087</b>              | <b>0.088</b>            | <b>0.051</b>               | <b>0.193</b>            | <b>0.057</b>            | <b>-0.056</b>              | <b>-0.073</b>              |

| Parameter                              | Openness | Conscientiousness | Neg. Life Events        | Internalizing              | Life Satisfaction          | Self-Esteem                | Self-Efficacy              | Optimism                   | DSpre2                     | DSpre3                     |
|----------------------------------------|----------|-------------------|-------------------------|----------------------------|----------------------------|----------------------------|----------------------------|----------------------------|----------------------------|----------------------------|
| <i>A</i> <sub>negativeLifeEvents</sub> |          |                   | 1.387<br>[1.374, 1.399] | 0.144<br>[0.137, 0.152]    | -0.096<br>[-0.100, -0.092] | -0.016<br>[-0.02, -0.011]  | 0.073<br>[0.065, 0.082]    | -0.044<br>[-0.049, -0.039] | 0.046<br>[0.042, 0.050]    | 0.059<br>[0.054, 0.064]    |
|                                        |          |                   | <b>0.540</b>            | <b>0.144</b>               | <b>-0.205</b>              | <b>-0.044</b>              | <b>0.073</b>               | <b>-0.075</b>              | <b>0.097</b>               | <b>0.123</b>               |
| <i>D</i> <sub>negativeLifeEvents</sub> |          |                   | 0.380<br>[0.356, 0.405] | -0.171<br>[-0.190, -0.151] | 0.050<br>[0.045, 0.055]    | 0.034<br>[0.029, 0.039]    | 0.024<br>[-0.001, 0.048]   | 0.136<br>[0.124, 0.146]    | 0.063<br>[0.051, 0.075]    | -0.046<br>[-0.057, -0.034] |
|                                        |          |                   | <b>0.148</b>            | <b>-0.170</b>              | <b>0.106</b>               | <b>0.096</b>               | <b>0.023</b>               | <b>0.233</b>               | <b>0.133</b>               | <b>-0.096</b>              |
| <i>E</i> <sub>negativeLifeEvents</sub> |          |                   | 2.053<br>[2.050, 2.056] | 0.078<br>[0.076, 0.079]    | -0.013<br>[-0.013, -0.012] | -0.013<br>[-0.013, -0.012] | -0.042<br>[-0.044, -0.041] | -0.054<br>[-0.055, -0.053] | 0.045<br>[0.044, 0.046]    | 0.040<br>[0.040, 0.041]    |
|                                        |          |                   | <b>0.799</b>            | <b>0.077</b>               | <b>-0.027</b>              | <b>-0.036</b>              | <b>-0.042</b>              | <b>-0.092</b>              | <b>0.095</b>               | <b>0.085</b>               |
| <i>A</i> <sub>Internalizing</sub>      |          |                   |                         | 0.522<br>[0.516, 0.529]    | -0.196<br>[-0.200, -0.192] | -0.121<br>[-0.126, -0.116] | -0.085<br>[-0.094, -0.076] | -0.089<br>[-0.094, -0.076] | 0.156<br>[0.151, 0.161]    | 0.138<br>[0.132, 0.144]    |
|                                        |          |                   |                         | <b>0.520</b>               | <b>-0.417</b>              | <b>-0.341</b>              | <b>-0.084</b>              | <b>-0.153</b>              | <b>0.328</b>               | <b>0.289</b>               |
| <i>D</i> <sub>Internalizing</sub>      |          |                   |                         | 0.338<br>[0.327, 0.349]    | -0.035<br>[-0.039, -0.030] | -0.044<br>[-0.047, -0.040] | -0.325<br>[-0.335, -0.315] | -0.153<br>[-0.161, -0.145] | 0.148<br>[0.141, 0.155]    | 0.159<br>[0.154, 0.164]    |
|                                        |          |                   |                         | <b>0.337</b>               | <b>-0.074</b>              | <b>-0.123</b>              | <b>-0.321</b>              | <b>-0.263</b>              | <b>0.311</b>               | <b>0.333</b>               |
| <i>E</i> <sub>Internalizing</sub>      |          |                   |                         | 0.712<br>[0.711, 0.713]    | -0.083<br>[-0.084, -0.083] | -0.070<br>[-0.071, -0.070] | -0.176<br>[-0.178, -0.175] | -0.057<br>[-0.058, -0.056] | 0.093<br>[0.092, 0.094]    | 0.134<br>[0.133, 0.135]    |
|                                        |          |                   |                         | <b>0.709</b>               | <b>-0.178</b>              | <b>-0.198</b>              | <b>-0.174</b>              | <b>-0.098</b>              | <b>0.196</b>               | <b>0.280</b>               |
| <i>A</i> <sub>LifeSatisfaction</sub>   |          |                   |                         |                            | 0.177<br>[0.173, 0.181]    | 0.036<br>[0.031, 0.042]    | 0.200<br>[0.190, 0.211]    | 0.098<br>[0.093, 0.104]    | -0.023<br>[-0.028, -0.018] | 0.032<br>[0.026, 0.037]    |
|                                        |          |                   |                         |                            | <b>0.378</b>               | <b>0.102</b>               | <b>0.198</b>               | <b>0.169</b>               | <b>-0.049</b>              | <b>0.067</b>               |
| <i>D</i> <sub>LifeSatisfaction</sub>   |          |                   |                         |                            | 0.047<br>[0.044, 0.051]    | 0.017<br>[0.013, 0.020]    | 0.187<br>[0.176, 0.199]    | -0.068<br>[-0.074, -0.061] | 0.100<br>[0.090, 0.110]    | -0.056<br>[-0.061, -0.051] |
|                                        |          |                   |                         |                            | <b>0.101</b>               | <b>0.047</b>               | <b>0.185</b>               | <b>-0.116</b>              | <b>0.210</b>               | <b>-0.117</b>              |
| <i>E</i> <sub>LifeSatisfaction</sub>   |          |                   |                         |                            | 0.313<br>[0.313, 0.314]    | 0.119<br>[0.118, 0.119]    | 0.158<br>[0.157, 0.160]    | 0.127<br>[0.126, 0.128]    | -0.137<br>[-0.138, -0.136] | -0.118<br>[-0.119, -0.117] |
|                                        |          |                   |                         |                            | <b>0.667</b>               | <b>0.334</b>               | <b>0.156</b>               | <b>0.218</b>               | <b>-0.290</b>              | <b>-0.247</b>              |
| <i>A</i> <sub>Self-Esteem</sub>        |          |                   |                         |                            |                            | 0.039<br>[0.029, 0.049]    | 0.101<br>[0.070, 0.131]    | 0.033<br>[0.021, 0.044]    | -0.007<br>[-0.015, 0.001]  | 0.013<br>[0.002, 0.024]    |
|                                        |          |                   |                         |                            |                            | <b>0.110</b>               | <b>0.099</b>               | <b>0.056</b>               | <b>-0.015</b>              | <b>0.028</b>               |
| <i>D</i> <sub>Self-Esteem</sub>        |          |                   |                         |                            |                            | 0.009<br>[0.004, 0.014]    | -0.028<br>[-0.055, -0.003] | -0.027<br>[-0.043, -0.011] | -0.050<br>[-0.076, -0.025] | -0.027<br>[-0.042, -0.014] |
|                                        |          |                   |                         |                            |                            | <b>0.024</b>               | <b>-0.028</b>              | <b>-0.047</b>              | <b>-0.106</b>              | <b>-0.058</b>              |
| <i>E</i> <sub>Self-Esteem</sub>        |          |                   |                         |                            |                            | 0.226<br>[0.226, 0.227]    | 0.125<br>[0.123, 0.126]    | 0.078<br>[0.077, 0.079]    | -0.094<br>[-0.095, -0.093] | -0.092<br>[-0.093, -0.091] |
|                                        |          |                   |                         |                            |                            | <b>0.636</b>               | <b>0.123</b>               | <b>0.134</b>               | <b>-0.199</b>              | <b>-0.192</b>              |

| Parameter                  | Openness | Conscientiousness | Neg. Life Events | Internalizing | Life Satisfaction | Self-Esteem | Self-Efficacy            | Optimism                 | DSpre2                     | DSpre3                     |
|----------------------------|----------|-------------------|------------------|---------------|-------------------|-------------|--------------------------|--------------------------|----------------------------|----------------------------|
| $A_{\text{Self-Efficacy}}$ |          |                   |                  |               |                   |             | 0.000<br>[-0.043, 0.043] | 0.000<br>[-0.011, 0.011] | 0.000<br>[-0.008, 0.008]   | 0.000<br>[-0.014, 0.014]   |
|                            |          |                   |                  |               |                   |             | <b>0.000</b>             | <b>0.000</b>             | <b>0.000</b>               | <b>0.000</b>               |
| $D_{\text{Self-Efficacy}}$ |          |                   |                  |               |                   |             | 0.000<br>[-0.027, 0.028] | 0.000<br>[-0.016, 0.017] | 0.000<br>[-0.025, 0.027]   | 0.000<br>[-0.013, 0.014]   |
|                            |          |                   |                  |               |                   |             | <b>0.001</b>             | <b>0.001</b>             | <b>0.002</b>               | <b>0.001</b>               |
| $E_{\text{Self-Efficacy}}$ |          |                   |                  |               |                   |             | 0.702<br>[0.700, 0.703]  | 0.058<br>[0.057, 0.060]  | -0.055<br>[-0.056, -0.054] | -0.014<br>[-0.015, -0.014] |
|                            |          |                   |                  |               |                   |             | <b>0.693</b>             | <b>0.100</b>             | <b>-0.116</b>              | <b>-0.030</b>              |
| $A_{\text{Optimism}}$      |          |                   |                  |               |                   |             |                          | 0.000<br>[-0.010, 0.010] | 0.000<br>[-0.005, 0.005]   | 0.000<br>[-0.012, 0.012]   |
|                            |          |                   |                  |               |                   |             |                          | <b>0.000</b>             | <b>0.000</b>               | <b>0.000</b>               |
| $D_{\text{Optimism}}$      |          |                   |                  |               |                   |             |                          | 0.000<br>[-0.016, 0.016] | 0.000<br>[-0.021, 0.021]   | 0.000<br>[-0.013, 0.013]   |
|                            |          |                   |                  |               |                   |             |                          | <b>0.000</b>             | <b>0.000</b>               | <b>0.000</b>               |
| $E_{\text{Optimism}}$      |          |                   |                  |               |                   |             |                          | 0.459<br>[0.458, 0.460]  | -0.065<br>[-0.066, -0.064] | 0.031<br>[0.031, 0.032]    |
|                            |          |                   |                  |               |                   |             |                          | <b>0.788</b>             | <b>-0.137</b>              | <b>0.066</b>               |
| $A_{\text{DSpre2}}$        |          |                   |                  |               |                   |             |                          |                          | 0.000<br>[-0.005, 0.005]   | 0.000<br>[-0.008, 0.009]   |
|                            |          |                   |                  |               |                   |             |                          |                          | <b>0.000</b>               | <b>0.000</b>               |
| $D_{\text{DSpre2}}$        |          |                   |                  |               |                   |             |                          |                          | 0.000<br>[-0.017, 0.018]   | 0.000<br>[-0.009, 0.009]   |
|                            |          |                   |                  |               |                   |             |                          |                          | <b>0.000</b>               | <b>0.000</b>               |
| $E_{\text{DSpre2}}$        |          |                   |                  |               |                   |             |                          |                          | 0.297<br>[0.297, 0.298]    | 0.028<br>[0.027, 0.029]    |
|                            |          |                   |                  |               |                   |             |                          |                          | <b>0.627</b>               | <b>0.058</b>               |
| $A_{\text{DSpre3}}$        |          |                   |                  |               |                   |             |                          |                          |                            | 0.000<br>[-0.008, 0.008]   |
|                            |          |                   |                  |               |                   |             |                          |                          |                            | <b>0.000</b>               |
| $D_{\text{DSpre3}}$        |          |                   |                  |               |                   |             |                          |                          |                            | 0.000<br>[-0.008, 0.008]   |
|                            |          |                   |                  |               |                   |             |                          |                          |                            | <b>0.000</b>               |
| $E_{\text{DSpre3}}$        |          |                   |                  |               |                   |             |                          |                          |                            | 0.307<br>[0.306, 0.307]    |
|                            |          |                   |                  |               |                   |             |                          |                          |                            | <b>0.643</b>               |

Note. Standardized estimates are bold-faced. Likelihood-based confidence intervals are shown in brackets. DSpre2,3 = depression symptoms at pre-pandemic measurements 2,3; Neg. = negative; Internalizing = internalizing problem behavior;  $A_x$  = additive genetic component of the subscript variable  $x$ ;  $D_x$  = non-additive genetic component of the subscript variable  $x$ ;  $E_x$  = unique environmental component of the subscript variable  $x$ .

**Figure E2.** Cholesky ADE Decomposition Model

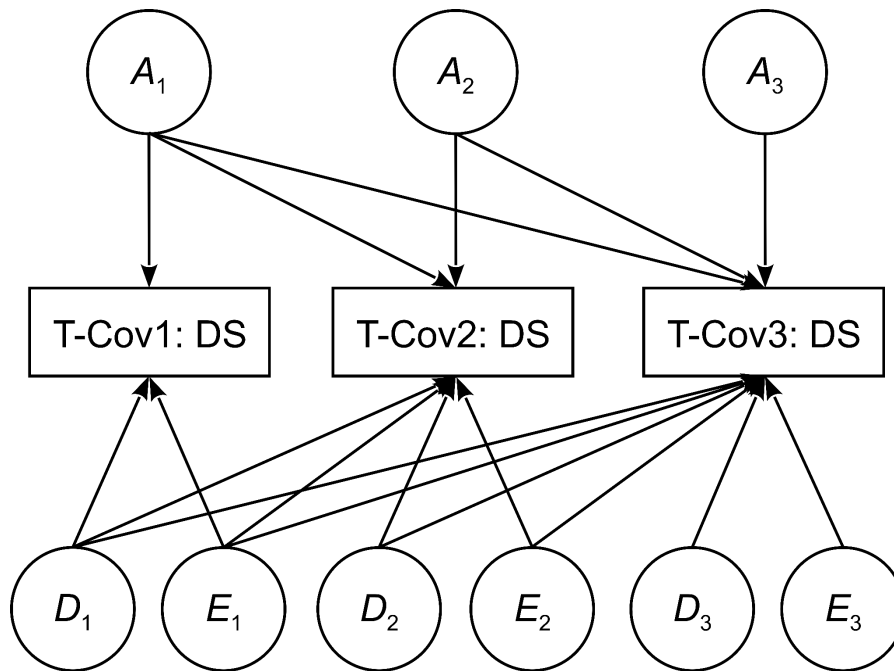

*Note.*  $A$  = additive genetic factor;  $D$  = non-additive genetic factor;  $E$  = unique environmental factor; T-Cov1/2/3 = pandemic measurement 1/2/3; DS = depression symptoms. Path parameters are omitted for readability.

Figure E3. Common Factor Model

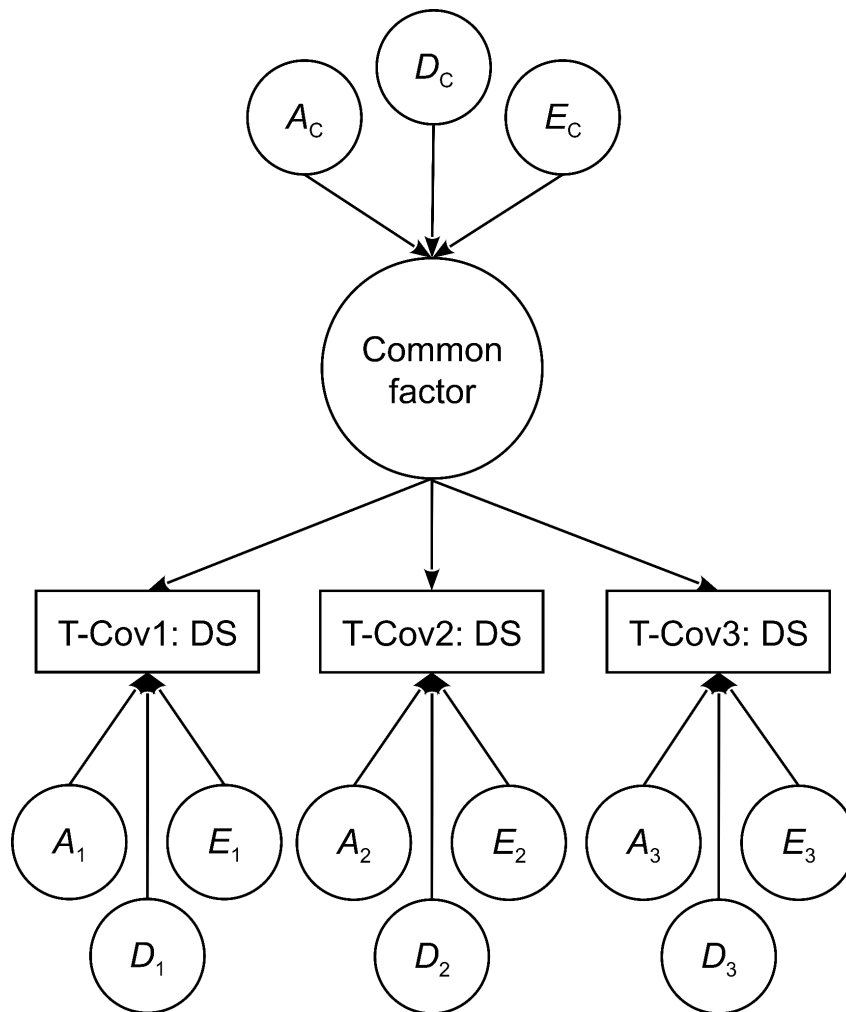

Note. A = additive genetic factor; D = non-additive genetic factor; E = unique environmental factor; T-Cov1/2/3 = pandemic measurement 1/2/3; DS = depression symptoms. Path parameters are omitted for readability.

Figure E4. Genetically Informative Latent Growth Curve Model

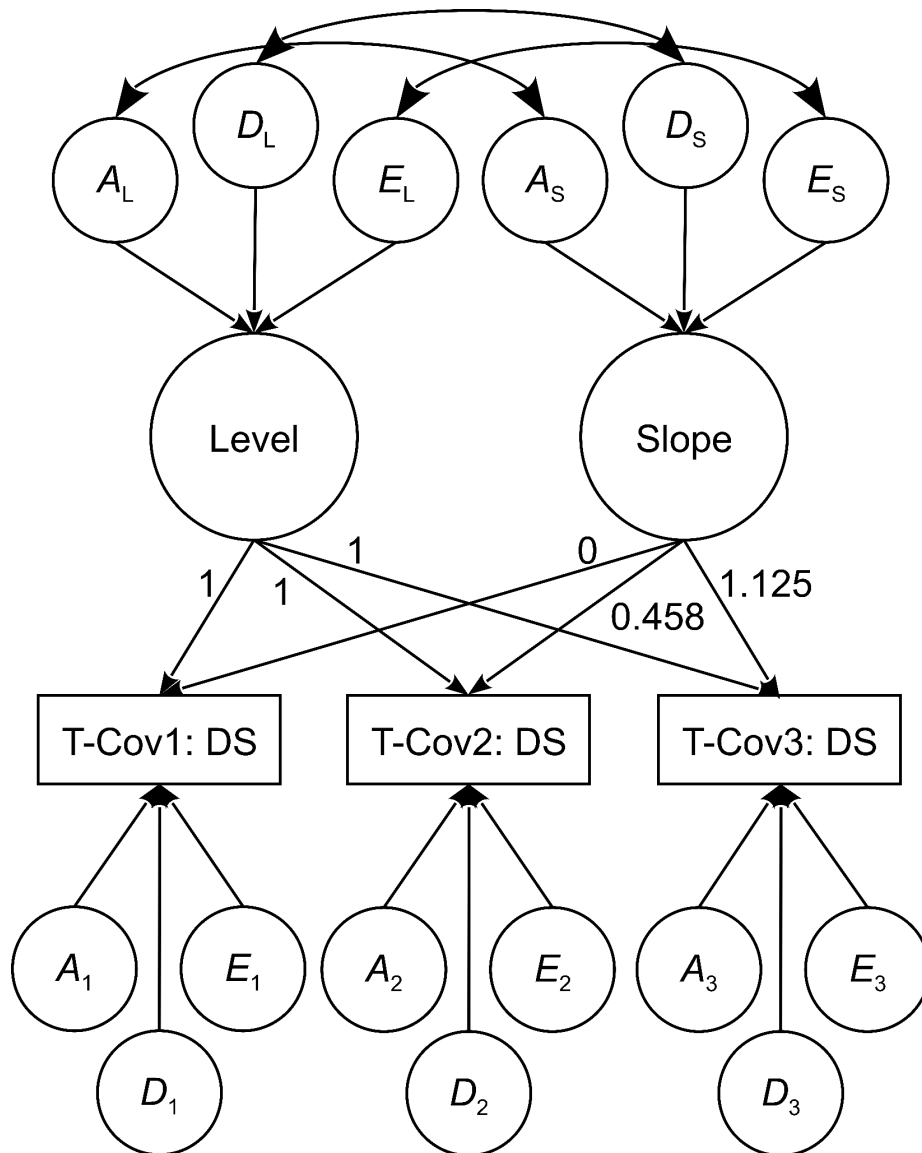

Note. A = additive genetic factor; D = non-additive genetic factor; E = unique environmental factor; T-Cov1/2/3 = pandemic measurement 1/2/3; DS = depression symptoms. Fixed path parameters are shown, free path parameters are omitted for readability. Slope path parameters represent the mean amount of months passed after the reference point (5.5 and 13.5 months) divided by 12 (months).



## References

- Bates, T. C., Neale, M. C., & Maes, H. H. (2019). umx: A library for Structural Equation and Twin Modelling in R. *Twin Research and Human Genetics*, 22, 27-41. <https://doi.org/gf23hd>
- Beck, A. T., Steer, R. A., & Brown, G. K. (2000). *Manual for the BDI-Fast Screen for medical patients*. The Psychological Corporation.
- Beierlein, C., Kovaleva, A., Kemper, C. J., & Rammstedt, B. (2012). Ein Messinstrument zur Erfassung subjektiver Kompetenzerwartungen. Allgemeine Selbstwirksamkeit-Kurzskala (ASKU). *GESIS Working Papers*. <https://doi.org/jsmd>
- Blagus, R. (2017). *abe: Augmented Backward Elimination. R package version 3.0.1*. <https://CRAN.R-project.org/package=abe>
- Clark, L. A., Watson, D., & Mineka, S. (1994). Temperament, personality, and the mood and anxiety disorders. *Journal of Abnormal Psychology*, 103(1), 103–116. <https://doi.org/brx79j>
- Diewald, M., Kandler, C., Riemann, R., Spinath, F. M., Baier, T., Bartling, A., Baum, M. A., ... & Weigel, L. (2022). TwinLife. *GESIS Data Archive, ZA6701*. Data file Version 6.0.0. <https://doi.org/jrgm>
- Dunkler, D., Plischke, M., Leffondré, K., & Heinze, G. (2014). Augmented Backward Elimination: A Pragmatic and Purposeful Way to Develop Statistical Models. *PLoS ONE*, 9(11), e113677. <https://doi.org/f6tcfcd>
- Endler, N. S., & Parker, J. D. A. (1999). *Coping Inventory for Stressful Situations (CISS): Manual*. Multi-Health Systems.
- Gadermann, A. M., Schonert-Reichl, K. A., & Zumbo, B. D. (2010). Investigating validity evidence of the Satisfaction with Life Scale adapted for children. *Social Indicators Research*, 96, 229–247. <https://doi.org/bjs3hq>
- Gerlitz, J. Y., & Schupp, J. (2005). Zur Erhebung der Big-Five-basierten Persönlichkeitsmerkmale im SOEP. *DIW Research Notes* 4.
- Gillespie, N. A., Eaves, L. J., Maes, H., & Silberg, J. L. (2015). Testing models for the contributions of genes and environment to developmental change in adolescent depression. *Behavior Genetics*, 45, 382–393. <https://doi.org/f7fmq5>
- Glaesmer, H., Hoyer, J., Klotsche, J., & Herzberg, P. Y. (2008). Die Deutsche Version des Life-Oriented Tests (LOT-R zum dispositionellen Optimismus und Pessimismus. *Zeitschrift für Gesundheitspsychologie*, 16(1), 26–31. <https://doi.org/cjdcpb>
- Goodman, R., Meltzer, H., & Bailey, V. (1998). The Strengths and Difficulties Questionnaire: A pilot study on the validity of the self-report version. *European Child & Adolescent Psychiatry*, 7(3), 125–130. <https://doi.org/cvfhz2>
- Gottschling, J., Hahn, E., Beam, C. R., Spinath, F. M., Carroll, S., & Turkheimer, E. (2019). Socioeconomic status amplifies genetic effects in middle childhood in a large German twin sample. *Intelligence*, 72, 20–27. <https://doi.org/ggxwrk>
- Haehner, P., Kritzler, S., Fassbender, I., & Luhmann, M. (2021). Stability and Change of Perceived Characteristics of Major Life Events. <https://doi.org/jsmf>
- Hahn, E., Gottschling, J., Bleidorn, W., Kandler, C., Spengler, M., Kornadt, A. E., ... & Spinath, F. M. (2016). What drives the development of social inequality over the life course? The German TwinLife Study. *Twin Research and Human Genetics*, 19(6), 659-672. <https://doi.org/f9fzt6>
- Hampel, P., Petermann, F., & Dickow, B. (1997). *Stressverarbeitungsbogen von Janke und Erdmann angepasst für Kinder und Jugendliche (SVF-KJ)*. Hogrefe.
- Jann, B. (2019). *iscogen: Stata module to translate ISCO codes*. <http://ideas.repec.org/c/boc/bocode/s458665.html> (version 1.0.6 from 16 Nov 2020).
- Jorgensen, T. D., Pornprasertmanit, S., Schoemann, A. M., & Rosseel, Y. (2022). *semTools: Useful tools for structural equation modeling. R package version 0.5-6*. <https://CRAN.R-project.org/package=semTools>

- Kandler, C., & Ostendorf, F. (2016). Additive and synergetic contributions of neuroticism and life events to depression and anxiety in women. *European Journal of Personality, 30*(4), 390–405. <https://doi.org/f9c3bc>
- Kliem, S., Mößle, T., Zenger, M., & Brähler, E. (2014). Reliability and validity of the Beck Depression Inventory Fast Screen for medical patients in the general German population. *Journal of Affective Disorders, 156*, 236–239. <https://doi.org/f5qpm5>
- Löwe, B., Kroenke, K., & Gräfe, K. (2005). Detecting and monitoring depression with a two-item questionnaire (PHQ-2). *Journal of Psychosomatic Research, 58*(2), 163-171. <https://doi.org/fwriwn>
- Lüdecke, D. (2022). sjlabelled: Labelled Data Utility Functions. R package version 1.2.0. <https://CRAN.R-project.org/package=sjlabelled>
- Matheny Jr, A. P., Wachs, T. D., Ludwig, J. L., & Phillips, K. (1995). Bringing order out of chaos: Psychometric characteristics of the confusion, hubbub, and order scale. *Journal of Applied Developmental Psychology, 16*(3), 429–454. <https://doi.org/fbzt8h>
- Nimon, K., Oswald, F., Roberts, J. K. (2021). *yhat: Interpreting Regression Effects*. R package version 2.0.3. <https://CRAN.R-project.org/package=yhat>
- Oshio, A., Taku, K., Hirano, M., & Saeed, G. (2018). Resilience and Big Five personality traits: A meta-analysis. *Personality and Individual Differences, 127*, 54–60. <https://doi.org/gdcwp9>
- Reim, J., Alt, P., Geissler, S., Sawatzki, B., Thönnissen, C., & Walper, S. (2022). pairfam scales and instruments manual, release 13.0. LMU Munich: Technical Report. GESIS Data Archive. ZA5678 Data File Version 13.0.0. <https://doi.org/jsmg>
- Revelle, W. (2022) *psych: Procedures for Personality and Psychological Research*. Northwestern University. <https://CRAN.R-project.org/package=psych>.
- Rosseel, Y. (2012). lavaan: An R Package for Structural Equation Modeling. *Journal of Statistical Software, 48*(2), 1-36. <https://doi.org/f3r4v8>
- R Core Team (2022). R: A language and environment for statistical computing. R Foundation for Statistical Computing. <https://www.R-project.org/>
- RStudio Team (2020). *RStudio: Integrated Development for R*. RStudio, PBC. <http://www.rstudio.com/>
- Schneider, S. L. (2008). The International Standard Classification of Education (ISCED-97). An Evaluation of Content and Criterion Validity for 15 European Countries. <http://www.mzes.uni-mannheim.de/publications/books/isced97.html>
- Solt, F., & Hu, Y. (2021). *dotwhisker: Dot-and-Whisker Plots of Regression Results*. R package version 0.7.4. <https://CRAN.R-project.org/package=dotwhisker>
- StataCorp (2015). *Stata Statistical Software: Release 14*. StataCorp LP.
- Turkheimer, E. (2000). Three Laws of Behavior Genetics and What They Mean. *Current Directions in Psychological Science, 9*(5), 160-164. <https://doi.org/fnmfrn>
